# Supplementary material for: Genes Influenced by the Non-Muscle Isoform of Myosin Light Chain Kinase Impact Human Cancer Prognosis
Source: PubMed Central journal article supplement (PMC3979809; doi:10.1371/journal.pone.0094325), 2014-04-08

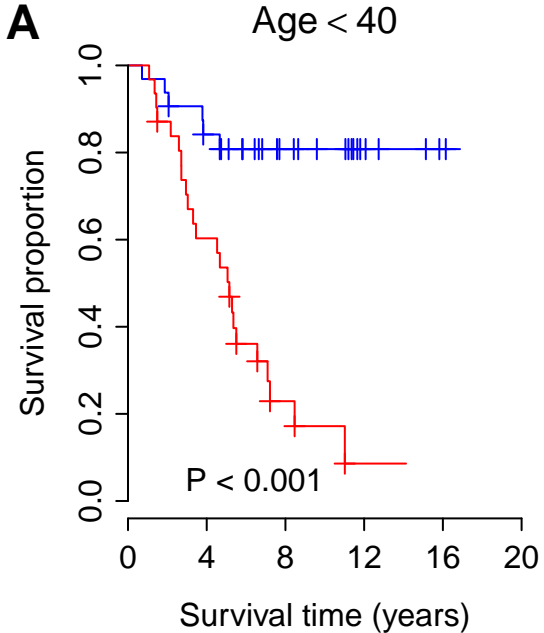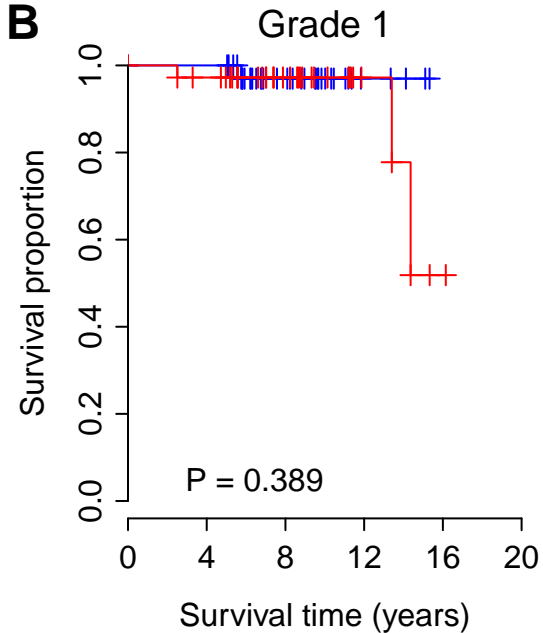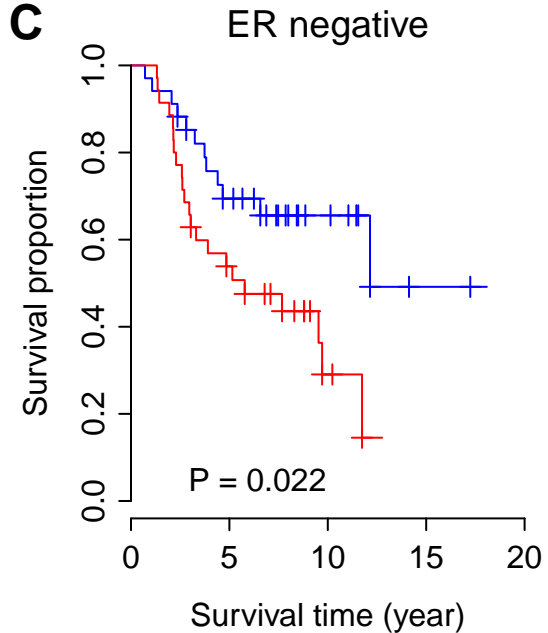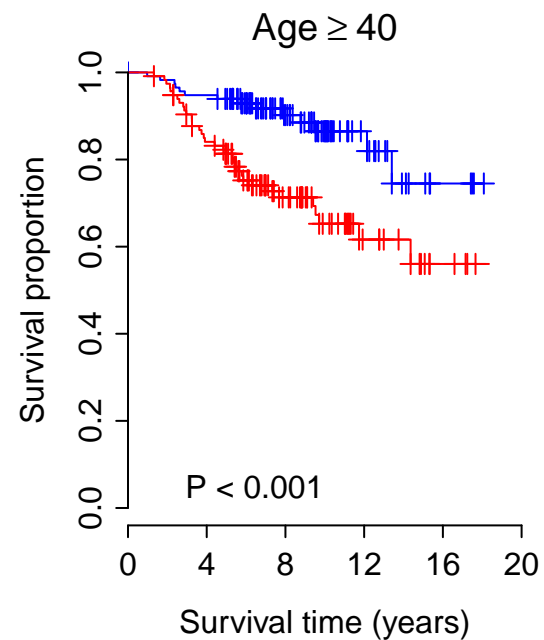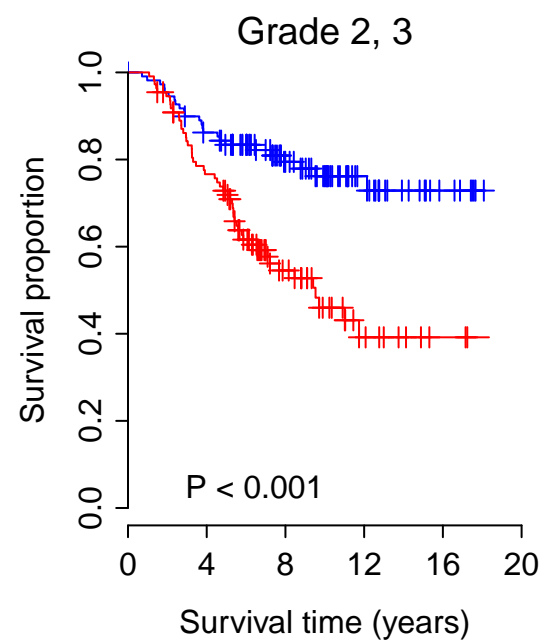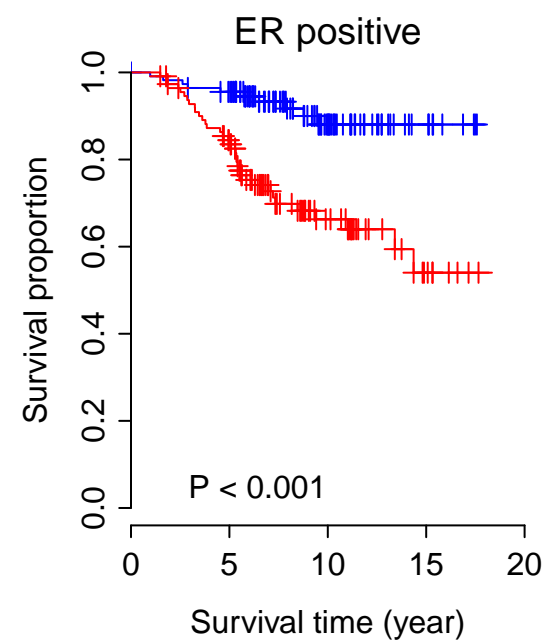

Supplement: pone.0094325.s002.pdf [file pone.0094325.s002.pdf]
