# Supplementary material for: Genes Influenced by the Non-Muscle Isoform of Myosin Light Chain Kinase Impact Human Cancer Prognosis
Source: PubMed Central journal article supplement (PMC3979809; doi:10.1371/journal.pone.0094325), 2014-04-08
Supplement: pone.0094325.s006.pdf [file pone.0094325.s006.pdf]

Table S1. Differentially expressed genes between VILI-exposed WT and VILI-exposed nmMLCK KO mice

| Gene symbol          | Gene title                                                                                    | FC <sup>a</sup> | FDR     |
|----------------------|-----------------------------------------------------------------------------------------------|-----------------|---------|
| <i>2900097C17Rik</i> | RIKEN cDNA 2900097C17 gene                                                                    | 0.17            | 0.051   |
| <i>Arntl</i>         | aryl hydrocarbon receptor nuclear translocator-like                                           | 0.18            | < 0.001 |
| <i>Ptplad1</i>       | protein tyrosine phosphatase-like A domain containing 1                                       | 0.19            | 0.051   |
| <i>Upk1b</i>         | uroplakin 1B                                                                                  | 0.19            | < 0.001 |
| <i>5430404G13Rik</i> | RIKEN cDNA 5430404G13 gene                                                                    | 0.19            | < 0.001 |
| <i>5330426P16Rik</i> | RIKEN cDNA 5330426P16 gene                                                                    | 0.22            | < 0.001 |
| <i>Cxcl5</i>         | chemokine (C-X-C motif) ligand 5                                                              | 0.22            | < 0.001 |
| <i>Rab27a</i>        | RAB27A, member RAS oncogene family                                                            | 0.23            | < 0.001 |
| <i>Gjal</i>          | gap junction protein, alpha 1                                                                 | 0.23            | 0.051   |
| <i>S1pr3</i>         | sphingosine-1-phosphate receptor 3                                                            | 0.23            | 0.051   |
| <i>Cyth1</i>         | cytohesin 1                                                                                   | 0.23            | < 0.001 |
| <i>Il6st</i>         | interleukin 6 signal transducer                                                               | 0.24            | 0.051   |
| <i>Cxcl2</i>         | chemokine (C-X-C motif) ligand 2                                                              | 0.24            | 0.051   |
| <i>AI848100</i>      | expressed sequence AI848100                                                                   | 0.24            | < 0.001 |
| <i>Mbtps1</i>        | membrane-bound transcription factor peptidase, site 1                                         | 0.24            | 0.051   |
| <i>C330007P06Rik</i> | RIKEN cDNA C330007P06 gene                                                                    | 0.24            | < 0.001 |
| <i>Stom</i>          | stomatin                                                                                      | 0.24            | < 0.001 |
| <i>Arl15</i>         | ADP-ribosylation factor-like 15                                                               | 0.26            | < 0.001 |
| <i>Fbxw11</i>        | F-box and WD-40 domain protein 11                                                             | 0.26            | 0.051   |
| <i>Trim35</i>        | tripartite motif-containing 35                                                                | 0.27            | 0.051   |
| <i>Epb4.1l2</i>      | erythrocyte protein band 4.1-like 2                                                           | 0.27            | 0.051   |
| <i>Ptx3</i>          | pentraxin related gene                                                                        | 0.28            | 0.051   |
| <i>Ndst1</i>         | N-deacetylase/N-sulfotransferase (heparan glucosaminyl) 1                                     | 0.30            | 0.051   |
| <i>Calcr1</i>        | calcitonin receptor-like                                                                      | 0.30            | 0.051   |
| <i>Tmem33</i>        | transmembrane protein 33                                                                      | 0.30            | < 0.001 |
| <i>Abca1</i>         | ATP-binding cassette, sub-family A (ABC1), member 1                                           | 0.30            | 0.051   |
| <i>Mme</i>           | membrane metallo endopeptidase                                                                | 0.30            | < 0.001 |
| <i>Tm9sf3</i>        | transmembrane 9 superfamily member 3                                                          | 0.31            | 0.051   |
| <i>Jhdm1d</i>        | jumonji C domain-containing histone demethylase 1 homolog D ( <i>S. cerevisiae</i> )          | 0.31            | 0.051   |
| <i>Spry4</i>         | sprouty homolog 4 ( <i>Drosophila</i> )                                                       | 0.31            | 0.051   |
| <i>Spty2d1</i>       | SPT2, Suppressor of Ty, domain containing 1 ( <i>S. cerevisiae</i> )                          | 0.31            | < 0.001 |
| <i>Osmr</i>          | oncostatin M receptor                                                                         | 0.31            | < 0.001 |
| <i>Ide</i>           | insulin degrading enzyme                                                                      | 0.31            | < 0.001 |
| <i>Sigmar1</i>       | sigma non-opioid intracellular receptor 1                                                     | 0.32            | < 0.001 |
| <i>Adamts4</i>       | a disintegrin-like and metallopeptidase (reprolysin type) with thrombospondin type 1 motif, 4 | 0.32            | < 0.001 |
| <i>Mtpn</i>          | myotrophin                                                                                    | 0.32            | 0.051   |
| <i>Stk38l</i>        | serine/threonine kinase 38 like                                                               | 0.32            | 0.051   |
| <i>4833439L19Rik</i> | RIKEN cDNA 4833439L19 gene                                                                    | 0.33            | 0.051   |
| <i>Podxl</i>         | podocalyxin-like                                                                              | 0.33            | 0.051   |
| <i>Ranbp6</i>        | RAN binding protein 6                                                                         | 0.33            | < 0.001 |
| <i>Cd38</i>          | CD38 antigen                                                                                  | 0.33            | 0.051   |
| <i>Slc23a2</i>       | solute carrier family 23 (nucleobase transporters), member 2                                  | 0.34            | 0.051   |
| <i>4932438A13Rik</i> | RIKEN cDNA 4932438A13 gene                                                                    | 0.34            | 0.051   |
| <i>Map3k7</i>        | mitogen-activated protein kinase kinase kinase 7                                              | 0.34            | < 0.001 |

|                      |                                                                                     |      |         |
|----------------------|-------------------------------------------------------------------------------------|------|---------|
| <i>Dep1</i>          | diabetic embryopathy 1                                                              | 0.34 | 0.051   |
| <i>Ccl9</i>          | chemokine (C-C motif) ligand 9                                                      | 0.34 | < 0.001 |
| <i>Pkia</i>          | protein kinase inhibitor, alpha                                                     | 0.34 | 0.051   |
| <i>Ptprk</i>         | protein tyrosine phosphatase, receptor type, K                                      | 0.35 | 0.051   |
| <i>Spon2</i>         | spondin 2, extracellular matrix protein                                             | 0.35 | 0.051   |
| <i>Lims1</i>         | LIM and senescent cell antigen-like domains 1                                       | 0.35 | 0.051   |
| <i>A630005I04Rik</i> | RIKEN cDNA A630005I04 gene                                                          | 0.35 | < 0.001 |
| <i>Brcc3</i>         | BRCA1/BRCA2-containing complex, subunit 3                                           | 0.35 | 0.051   |
| <i>0610010K06Rik</i> | RIKEN cDNA 0610010K06 gene                                                          | 0.36 | 0.051   |
| <i>Tgfbr2</i>        | transforming growth factor, beta receptor II                                        | 0.36 | 0.051   |
| <i>Nr3c1</i>         | nuclear receptor subfamily 3, group C, member 1                                     | 0.36 | 0.051   |
| <i>Tollip</i>        | toll interacting protein                                                            | 0.36 | 0.051   |
| <i>Ube3a</i>         | ubiquitin protein ligase E3A                                                        | 0.36 | 0.051   |
| <i>Vamp3</i>         | vesicle-associated membrane protein 3                                               | 0.36 | 0.051   |
| <i>Msrb3</i>         | methionine sulfoxide reductase B3                                                   | 0.36 | < 0.001 |
| <i>Prkcc</i>         | protein kinase C, gamma                                                             | 0.37 | < 0.001 |
| <i>Arpp19</i>        | cAMP-regulated phosphoprotein 19                                                    | 0.37 | < 0.001 |
| <i>Hipk3</i>         | homeodomain interacting protein kinase 3                                            | 0.37 | 0.051   |
| <i>Atrx</i>          | alpha thalassemia/mental retardation syndrome X-linked<br>homolog (human)           | 0.37 | 0.051   |
| <i>Gcnt2</i>         | glucosaminyl (N-acetyl) transferase 2, I-branching enzyme                           | 0.37 | 0.051   |
| <i>Pvr</i>           | poliovirus receptor                                                                 | 0.38 | 0.051   |
| <i>Tmed5</i>         | transmembrane emp24 protein transport domain containing 5                           | 0.38 | 0.051   |
| <i>Egfr</i>          | epidermal growth factor receptor                                                    | 0.38 | 0.051   |
| <i>Pla2g15</i>       | phospholipase A2, group XV                                                          | 0.38 | 0.051   |
| <i>1110018J18Rik</i> | RIKEN cDNA 1110018J18 gene                                                          | 0.38 | 0.051   |
| <i>Fam63a</i>        | family with sequence similarity 63, member A                                        | 0.38 | 0.051   |
| <i>Sfrp1</i>         | secreted frizzled-related protein 1                                                 | 0.38 | < 0.001 |
| <i>Smg1</i>          | SMG1 homolog, phosphatidylinositol 3-kinase-related kinase<br>( <i>C. elegans</i> ) | 0.38 | 0.051   |
| <i>Pi15</i>          | peptidase inhibitor 15                                                              | 0.38 | 0.051   |
| <i>Scamp1</i>        | secretory carrier membrane protein 1                                                | 0.38 | 0.051   |
| <i>Tgfbr1</i>        | transforming growth factor, beta receptor I                                         | 0.38 | 0.051   |
| <i>Gorab</i>         | golgin, RAB6-interacting                                                            | 0.39 | < 0.001 |
| <i>Abhd10</i>        | abhydrolase domain containing 10                                                    | 0.39 | < 0.001 |
| <i>Cd59a</i>         | CD59a antigen                                                                       | 0.39 | < 0.001 |
| <i>Mobk11b</i>       | MOB1, Mps One Binder kinase activator-like 1B (yeast)                               | 0.39 | 0.051   |
| <i>Ccdc91</i>        | coiled-coil domain containing 91                                                    | 0.39 | < 0.001 |
| <i>Ube2b</i>         | ubiquitin-conjugating enzyme E2B, RAD6 homology ( <i>S. cerevisiae</i> )            | 0.39 | < 0.001 |
| <i>Atl2</i>          | atlastin GTPase 2                                                                   | 0.39 | < 0.001 |
| <i>Pdlim5</i>        | PDZ and LIM domain 5                                                                | 0.39 | 0.051   |
| <i>Ccnd2</i>         | cyclin D2                                                                           | 0.40 | 0.051   |
| <i>Garn11</i>        | GTPase activating RANGAP domain-like 1                                              | 0.40 | 0.051   |
| <i>Bcl2l11</i>       | BCL2-like 11 (apoptosis facilitator)                                                | 0.40 | 0.051   |
| <i>Slc38a10</i>      | solute carrier family 38, member 10                                                 | 0.40 | < 0.001 |
| <i>Rbm18</i>         | RNA binding motif protein 18                                                        | 0.40 | 0.051   |
| <i>Prkar2a</i>       | protein kinase, cAMP dependent regulatory, type II alpha                            | 0.40 | 0.051   |
| <i>B230219D22Rik</i> | RIKEN cDNA B230219D22 gene                                                          | 0.40 | < 0.001 |
| <i>Plcx2</i>         | phosphatidylinositol-specific phospholipase C, X domain                             | 0.40 | < 0.001 |

|                      |                                                                                       |      |         |
|----------------------|---------------------------------------------------------------------------------------|------|---------|
|                      | containing 2                                                                          |      |         |
| <i>Abcb7</i>         | ATP-binding cassette, sub-family B (MDR/TAP), member 7                                | 0.40 | < 0.001 |
| <i>Carhsp1</i>       | calcium regulated heat stable protein 1                                               | 0.40 | < 0.001 |
| <i>Gna13</i>         | guanine nucleotide binding protein, alpha 13                                          | 0.40 | < 0.001 |
| <i>1700109H08Rik</i> | RIKEN cDNA 1700109H08 gene                                                            | 0.40 | < 0.001 |
| <i>1600029D21Rik</i> | RIKEN cDNA 1600029D21 gene                                                            | 0.40 | < 0.001 |
| <i>Nktr</i>          | natural killer tumor recognition sequence                                             | 0.41 | 0.051   |
| <i>Tgoln1</i>        | trans-golgi network protein                                                           | 0.41 | 0.051   |
| <i>Cybb</i>          | cytochrome b-245, beta polypeptide                                                    | 0.41 | < 0.001 |
| <i>Golph3</i>        | golgi phosphoprotein 3                                                                | 0.41 | 0.051   |
| <i>Trim15</i>        | tripartite motif-containing 15                                                        | 0.41 | 0.051   |
| <i>Prkab1</i>        | protein kinase, AMP-activated, beta 1 non-catalytic subunit                           | 0.41 | < 0.001 |
| <i>Lypla1</i>        | lysophospholipase 1                                                                   | 0.41 | 0.051   |
| <i>Zfand5</i>        | zinc finger, AN1-type domain 5                                                        | 0.41 | 0.051   |
| <i>Plek</i>          | pleckstrin                                                                            | 0.41 | 0.051   |
| <i>Immt</i>          | inner membrane protein, mitochondrial                                                 | 0.41 | 0.051   |
| <i>Cpeb4</i>         | cytoplasmic polyadenylation element binding protein 4                                 | 0.41 | 0.051   |
| <i>9030624J02Rik</i> | RIKEN cDNA 9030624J02 gene                                                            | 0.41 | 0.051   |
| <i>Alpl</i>          | alkaline phosphatase, liver/bone/kidney                                               | 0.41 | < 0.001 |
| <i>Itm2a</i>         | integral membrane protein 2A                                                          | 0.41 | < 0.001 |
| <i>Ada</i>           | adenosine deaminase                                                                   | 0.42 | < 0.001 |
| <i>2310035C23Rik</i> | RIKEN cDNA 2310035C23 gene                                                            | 0.42 | 0.051   |
| <i>Vtn</i>           | vitronectin                                                                           | 0.42 | < 0.001 |
| <i>Rad52</i>         | RAD52 homolog (S. cerevisiae)                                                         | 0.42 | < 0.001 |
| <i>Txndc9</i>        | thioredoxin domain containing 9                                                       | 0.42 | < 0.001 |
| <i>Pdgfd</i>         | platelet-derived growth factor, D polypeptide                                         | 0.42 | < 0.001 |
| <i>Pfkip</i>         | phosphofructokinase, platelet                                                         | 0.42 | 0.051   |
| <i>Tmed7</i>         | transmembrane emp24 protein transport domain containing 7                             | 0.42 | 0.051   |
| <i>Pfkfb3</i>        | 6-phosphofructo-2-kinase/fructose-2,6-biphosphatase 3                                 | 0.42 | 0.051   |
| <i>Tnfsf9</i>        | tumor necrosis factor (ligand) superfamily, member 9                                  | 0.42 | < 0.001 |
| <i>Vipr2</i>         | vasoactive intestinal peptide receptor 2                                              | 0.43 | < 0.001 |
| <i>Tug1</i>          | taurine upregulated gene 1                                                            | 0.43 | 0.051   |
| <i>Ahcy11</i>        | S-adenosylhomocysteine hydrolase-like 1                                               | 0.43 | 0.051   |
| <i>Slc35a3</i>       | solute carrier family 35 (UDP-N-acetylglucosamine (UDP-GlcNAc) transporter), member 3 | 0.43 | 0.051   |
| <i>Ahcy12</i>        | S-adenosylhomocysteine hydrolase-like 2                                               | 0.43 | < 0.001 |
| <i>Arhgap29</i>      | Rho GTPase activating protein 29                                                      | 0.43 | 0.051   |
| <i>Usp9x</i>         | ubiquitin specific peptidase 9, X chromosome                                          | 0.43 | 0.051   |
| <i>Pard6g</i>        | par-6 partitioning defective 6 homolog gamma (C. elegans)                             | 0.43 | < 0.001 |
| <i>Gna12</i>         | guanine nucleotide binding protein, alpha 12                                          | 0.43 | 0.051   |
| <i>Tfrc</i>          | transferrin receptor                                                                  | 0.43 | 0.051   |
| <i>Slc6a2</i>        | solute carrier family 6 (neurotransmitter transporter, noradrenalin), member 2        | 0.43 | < 0.001 |
| <i>Twsg1</i>         | twisted gastrulation homolog 1 (Drosophila)                                           | 0.43 | 0.051   |
| <i>Ids</i>           | iduronate 2-sulfatase                                                                 | 0.43 | 0.051   |
| <i>Tifa</i>          | TRAF-interacting protein with forkhead-associated domain                              | 0.44 | 0.051   |
| <i>Cyb5b</i>         | cytochrome b5 type B                                                                  | 0.44 | 0.051   |
| <i>Rcan1</i>         | regulator of calcineurin 1                                                            | 0.44 | 0.051   |
| <i>Ereg</i>          | epiregulin                                                                            | 0.44 | 0.051   |
| <i>Mapk14</i>        | mitogen-activated protein kinase 14                                                   | 0.44 | 0.051   |

|                      |                                                                                                |      |         |
|----------------------|------------------------------------------------------------------------------------------------|------|---------|
| <i>Flt3l</i>         | FMS-like tyrosine kinase 3 ligand                                                              | 0.44 | < 0.001 |
| <i>Cdkn1a</i>        | cyclin-dependent kinase inhibitor 1A (P21)                                                     | 0.44 | < 0.001 |
| <i>Cugbp1</i>        | CUG triplet repeat, RNA binding protein 1                                                      | 0.44 | < 0.001 |
| <i>Klhl5</i>         | kelch-like 5 (Drosophila)                                                                      | 0.44 | < 0.001 |
| <i>Adam17</i>        | a disintegrin and metallopeptidase domain 17                                                   | 0.44 | < 0.001 |
| <i>Has1</i>          | hyaluronan synthase1                                                                           | 0.44 | 0.051   |
| <i>C1galt1</i>       | core 1 synthase, glycoprotein-N-acetylgalactosamine 3-beta-galactosyltransferase, 1            | 0.44 | 0.051   |
| <i>Fam114a1</i>      | family with sequence similarity 114, member A1                                                 | 0.44 | < 0.001 |
| <i>1200011118Rik</i> | RIKEN cDNA 1200011118 gene                                                                     | 0.45 | 0.051   |
| <i>Cpeb2</i>         | cytoplasmic polyadenylation element binding protein 2                                          | 0.45 | 0.051   |
| <i>Bdp1</i>          | B double prime 1, subunit of RNA polymerase III transcription initiation factor IIIB           | 0.45 | < 0.001 |
| <i>Polr3c</i>        | polymerase (RNA) III (DNA directed) polypeptide C                                              | 0.45 | 0.051   |
| <i>Clec4n</i>        | C-type lectin domain family 4, member n                                                        | 0.45 | < 0.001 |
| <i>Nek6</i>          | NIMA (never in mitosis gene a)-related expressed kinase 6                                      | 0.45 | < 0.001 |
| <i>Sprr1a</i>        | small proline-rich protein 1A                                                                  | 0.45 | < 0.001 |
| <i>Rp2h</i>          | retinitis pigmentosa 2 homolog (human)                                                         | 0.45 | < 0.001 |
| <i>Plcb1</i>         | phospholipase C, beta 1                                                                        | 0.45 | < 0.001 |
| <i>Stk3</i>          | serine/threonine kinase 3 (Ste20, yeast homolog)                                               | 0.45 | 0.051   |
| <i>Bicd2</i>         | bicaudal D homolog 2 (Drosophila)                                                              | 0.46 | < 0.001 |
| <i>Ptar1</i>         | protein prenyltransferase alpha subunit repeat containing 1                                    | 0.46 | 0.051   |
| <i>P4hal</i>         | procollagen-proline, 2-oxoglutarate 4-dioxygenase (proline 4-hydroxylase), alpha 1 polypeptide | 0.46 | 0.051   |
| <i>Vcam1</i>         | vascular cell adhesion molecule 1                                                              | 0.46 | < 0.001 |
| <i>Nol11</i>         | nucleolar protein 11                                                                           | 0.46 | 0.051   |
| <i>Ywhag</i>         | tyrosine 3-monooxygenase/tryptophan 5-monooxygenase activation protein, gamma polypeptide      | 0.46 | 0.051   |
| <i>Tspan2</i>        | tetraspanin 2                                                                                  | 0.46 | 0.051   |
| <i>Nrp</i>           | neural regeneration protein                                                                    | 0.46 | < 0.001 |
| <i>Rnf141</i>        | ring finger protein 141                                                                        | 0.46 | < 0.001 |
| <i>Arid4b</i>        | AT rich interactive domain 4B (RBP1-like)                                                      | 0.46 | 0.051   |
| <i>2210018M11Rik</i> | RIKEN cDNA 2210018M11 gene                                                                     | 0.46 | < 0.001 |
| <i>Vsnl1</i>         | visinin-like 1                                                                                 | 0.46 | < 0.001 |
| <i>Twf1</i>          | twinfilin, actin-binding protein, homolog 1 (Drosophila)                                       | 0.46 | < 0.001 |
| <i>Entpd1</i>        | ectonucleoside triphosphate diphosphohydrolase 1                                               | 0.46 | < 0.001 |
| <i>Slc35a5</i>       | solute carrier family 35, member A5                                                            | 0.46 | < 0.001 |
| <i>Tmed2</i>         | transmembrane emp24 domain trafficking protein 2                                               | 0.47 | 0.051   |
| <i>Litaf</i>         | LPS-induced TN factor                                                                          | 0.47 | < 0.001 |
| <i>Mrpl50</i>        | mitochondrial ribosomal protein L50                                                            | 0.47 | < 0.001 |
| <i>Dcn1d1</i>        | DCN1, defective in cullin neddylation 1, domain containing 1 (S. cerevisiae)                   | 0.47 | 0.051   |
| <i>Plekha3</i>       | pleckstrin homology domain-containing, family A (phosphoinositide binding specific) member 3   | 0.47 | 0.051   |
| <i>Mbd1</i>          | methyl-CpG binding domain protein 1                                                            | 0.47 | < 0.001 |
| <i>Hipk2</i>         | homeodomain interacting protein kinase 2                                                       | 0.47 | < 0.001 |
| <i>Slc38a4</i>       | solute carrier family 38, member 4                                                             | 0.47 | < 0.001 |
| <i>Elmol</i>         | engulfment and cell motility 1, ced-12 homolog (C. elegans)                                    | 0.47 | 0.051   |
| <i>Dr1</i>           | down-regulator of transcription 1                                                              | 0.47 | 0.051   |
| <i>Ap3m1</i>         | adaptor-related protein complex 3, mu 1 subunit                                                | 0.47 | 0.051   |

|                      |                                                                         |      |         |
|----------------------|-------------------------------------------------------------------------|------|---------|
| <i>2700078E11Rik</i> | RIKEN cDNA 2700078E11 gene                                              | 0.47 | < 0.001 |
| <i>Kpna1</i>         | karyopherin (importin) alpha 1                                          | 0.47 | < 0.001 |
| <i>Ubr1</i>          | ubiquitin protein ligase E3 component n-recognin 1                      | 0.47 | 0.051   |
| <i>Wwc2</i>          | WW, C2 and coiled-coil domain containing 2                              | 0.47 | 0.051   |
| <i>EG665955</i>      | predicted gene, EG665955                                                | 0.47 | 0.051   |
| <i>Nt5c2</i>         | 5'-nucleotidase, cytosolic II                                           | 0.47 | 0.051   |
| <i>Gng2</i>          | guanine nucleotide binding protein (G protein), gamma 2                 | 0.47 | < 0.001 |
| <i>1500003O03Rik</i> | RIKEN cDNA 1500003O03 gene                                              | 0.47 | 0.051   |
| <i>Gulp1</i>         | GULP, engulfment adaptor PTB domain containing 1                        | 0.47 | < 0.001 |
| <i>Rapgef1</i>       | Rap guanine nucleotide exchange factor (GEF) 1                          | 0.47 | < 0.001 |
| <i>Cacna2d1</i>      | calcium channel, voltage-dependent, alpha2/delta subunit 1              | 0.47 | < 0.001 |
| <i>Cd44</i>          | CD44 antigen                                                            | 0.47 | 0.051   |
| <i>Slc26a4</i>       | solute carrier family 26, member 4                                      | 0.47 | < 0.001 |
| <i>Gosr1</i>         | golgi SNAP receptor complex member 1                                    | 0.48 | 0.051   |
| <i>Ppargc1a</i>      | peroxisome proliferative activated receptor, gamma, coactivator 1 alpha | 0.48 | < 0.001 |
| <i>Fam107a</i>       | family with sequence similarity 107, member A                           | 0.48 | < 0.001 |
| <i>Sel1l</i>         | sel-1 suppressor of lin-12-like ( <i>C. elegans</i> )                   | 0.48 | 0.051   |
| <i>Pdgfra</i>        | platelet derived growth factor receptor, alpha polypeptide              | 0.48 | 0.051   |
| <i>Gucyl1a3</i>      | guanylate cyclase 1, soluble, alpha 3                                   | 0.48 | 0.051   |
| <i>Ddhd1</i>         | DDHD domain containing 1                                                | 0.48 | < 0.001 |
| <i>Akt3</i>          | thymoma viral proto-oncogene 3                                          | 0.48 | 0.051   |
| <i>Pxn</i>           | paxillin                                                                | 0.48 | 0.051   |
| <i>Rasd1</i>         | RAS, dexamethasone-induced 1                                            | 0.48 | < 0.001 |
| <i>Hmgcs2</i>        | 3-hydroxy-3-methylglutaryl-Coenzyme A synthase 2                        | 0.48 | < 0.001 |
| <i>Acsl4</i>         | acyl-CoA synthetase long-chain family member 4                          | 0.48 | < 0.001 |
| <i>Kpna3</i>         | karyopherin (importin) alpha 3                                          | 0.48 | 0.051   |
| <i>D10Erd709e</i>    | DNA segment, Chr 10, ERATO Doi 709, expressed                           | 0.48 | < 0.001 |
| <i>Rnf13</i>         | ring finger protein 13                                                  | 0.48 | 0.051   |
| <i>Dio2</i>          | deiodinase, iodothyronine, type II                                      | 0.48 | < 0.001 |
| <i>Man1a2</i>        | mannosidase, alpha, class 1A, member 2                                  | 0.48 | 0.051   |
| <i>Lin7c</i>         | lin-7 homolog C ( <i>C. elegans</i> )                                   | 0.48 | 0.051   |
| <i>Nat12</i>         | N-acetyltransferase 12                                                  | 0.48 | 0.051   |
| <i>Braf</i>          | Braf transforming gene                                                  | 0.48 | < 0.001 |
| <i>Sp1</i>           | trans-acting transcription factor 1                                     | 0.48 | < 0.001 |
| <i>Prps2</i>         | phosphoribosyl pyrophosphate synthetase 2                               | 0.48 | 0.051   |
| <i>Hbp1</i>          | high mobility group box transcription factor 1                          | 0.48 | 0.051   |
| <i>Ptprb</i>         | protein tyrosine phosphatase, receptor type, B                          | 0.49 | < 0.001 |
| <i>Arhgef2</i>       | rho/rac guanine nucleotide exchange factor (GEF) 2                      | 0.49 | 0.051   |
| <i>Ints8</i>         | integrator complex subunit 8                                            | 0.49 | 0.051   |
| <i>Ednra</i>         | endothelin receptor type A                                              | 0.49 | < 0.001 |
| <i>Rbbp4</i>         | retinoblastoma binding protein 4                                        | 0.49 | < 0.001 |
| <i>Xiap</i>          | X-linked inhibitor of apoptosis                                         | 0.49 | 0.051   |
| <i>Lmnb1</i>         | lamin B1                                                                | 0.49 | < 0.001 |
| <i>Trib2</i>         | tribbles homolog 2 ( <i>Drosophila</i> )                                | 0.49 | 0.051   |
| <i>Pafah1b2</i>      | platelet-activating factor acetylhydrolase, isoform 1b, subunit 2       | 0.49 | < 0.001 |
| <i>Rps6kb1</i>       | ribosomal protein S6 kinase, polypeptide 1                              | 0.49 | 0.051   |
| <i>Pcnx</i>          | pecanex homolog ( <i>Drosophila</i> )                                   | 0.49 | 0.051   |
| <i>Otud4</i>         | OTU domain containing 4                                                 | 0.49 | 0.051   |
| <i>Etnk1</i>         | ethanolamine kinase 1                                                   | 0.49 | 0.051   |

|                      |                                                                                         |      |         |
|----------------------|-----------------------------------------------------------------------------------------|------|---------|
| <i>Cxcl1</i>         | chemokine (C-X-C motif) ligand 1                                                        | 0.49 | 0.051   |
| <i>Gnptab</i>        | N-acetylglucosamine-1-phosphate transferase, alpha and beta subunits                    | 0.49 | 0.051   |
| <i>Ly6g6c</i>        | lymphocyte antigen 6 complex, locus G6C                                                 | 0.49 | 0.051   |
| <i>Mier1</i>         | mesoderm induction early response 1 homolog ( <i>Xenopus laevis</i> )                   | 0.49 | 0.051   |
| <i>Eif4h</i>         | eukaryotic translation initiation factor 4H                                             | 0.49 | 0.051   |
| <i>Sema3c</i>        | sema domain, immunoglobulin domain (Ig), short basic domain, secreted, (semaphorin) 3C  | 0.49 | 0.051   |
| <i>Cap1</i>          | CAP, adenylate cyclase-associated protein 1 (yeast)                                     | 0.49 | 0.051   |
| <i>1810030O07Rik</i> | RIKEN cDNA 1810030O07 gene                                                              | 0.49 | 0.051   |
| <i>5730416O20Rik</i> | RIKEN cDNA 5730416O20 gene                                                              | 0.49 | 0.051   |
| <i>Usp12</i>         | ubiquitin specific peptidase 12                                                         | 0.50 | < 0.001 |
| <i>Atp8a1</i>        | ATPase, aminophospholipid transporter (APLT), class I, type 8A, member 1                | 0.50 | < 0.001 |
| <i>Chn1</i>          | chimerin (chimaerin) 1                                                                  | 0.50 | < 0.001 |
| <i>Rrm2b</i>         | ribonucleotide reductase M2 B (TP53 inducible)                                          | 0.50 | < 0.001 |
| <i>Appl1</i>         | adaptor protein, phosphotyrosine interaction, PH domain and leucine zipper containing 1 | 0.50 | < 0.001 |
| <i>Adam10</i>        | a disintegrin and metallopeptidase domain 10                                            | 0.50 | 0.051   |
| <i>Dapp1</i>         | dual adaptor for phosphotyrosine and 3-phosphoinositides 1                              | 0.50 | 0.051   |
| <i>Cpd</i>           | carboxypeptidase D                                                                      | 0.50 | 0.051   |
| <i>6720457D02Rik</i> | RIKEN cDNA 6720457D02 gene                                                              | 2.01 | < 0.001 |
| <i>Pgm2l1</i>        | phosphoglucomutase 2-like 1                                                             | 2.01 | < 0.001 |
| <i>Slco4c1</i>       | solute carrier organic anion transporter family, member 4C1                             | 2.01 | < 0.001 |
| <i>Zc3h15</i>        | zinc finger CCCH-type containing 15                                                     | 2.02 | < 0.001 |
| <i>Trmt6</i>         | tRNA methyltransferase 6 homolog ( <i>S. cerevisiae</i> )                               | 2.02 | < 0.001 |
| <i>Nhs12</i>         | NHS-like 2                                                                              | 2.02 | < 0.001 |
| <i>Ankrd11</i>       | ankyrin repeat domain 11                                                                | 2.02 | < 0.001 |
| <i>Zfp292</i>        | zinc finger protein 292                                                                 | 2.03 | < 0.001 |
| <i>Mical2</i>        | microtubule associated monooxygenase, calponin and LIM domain containing 2              | 2.03 | < 0.001 |
| <i>Pisd-ps3</i>      | phosphatidylserine decarboxylase, pseudogene 3                                          | 2.04 | < 0.001 |
| <i>Phka2</i>         | phosphorylase kinase alpha 2                                                            | 2.04 | < 0.001 |
| <i>Nup214</i>        | nucleoporin 214                                                                         | 2.04 | < 0.001 |
| <i>6820402A03Rik</i> | RIKEN cDNA 6820402A03 gene                                                              | 2.04 | < 0.001 |
| <i>Hnrnpu</i>        | heterogeneous nuclear ribonucleoprotein U                                               | 2.05 | < 0.001 |
| <i>Gatad2b</i>       | GATA zinc finger domain containing 2B                                                   | 2.06 | < 0.001 |
| <i>A330076H08Rik</i> | RIKEN cDNA A330076H08 gene                                                              | 2.06 | < 0.001 |
| <i>9430047G12Rik</i> | RIKEN cDNA 9430047G12 gene                                                              | 2.06 | < 0.001 |
| <i>Fubp1</i>         | far upstream element (FUSE) binding protein 1                                           | 2.07 | < 0.001 |
| <i>Wdfy3</i>         | WD repeat and FYVE domain containing 3                                                  | 2.09 | < 0.001 |
| <i>Cdkn1b</i>        | cyclin-dependent kinase inhibitor 1B                                                    | 2.09 | < 0.001 |
| <i>4933411K20Rik</i> | RIKEN cDNA 4933411K20 gene                                                              | 2.10 | < 0.001 |
| <i>Kank2</i>         | KN motif and ankyrin repeat domains 2                                                   | 2.10 | < 0.001 |
| <i>Vps13a</i>        | vacuolar protein sorting 13A (yeast)                                                    | 2.11 | < 0.001 |
| <i>Lrrk1</i>         | leucine-rich repeat kinase 1                                                            | 2.12 | < 0.001 |
| <i>Iqgap1</i>        | IQ motif containing GTPase activating protein 1                                         | 2.12 | < 0.001 |
| <i>Gan</i>           | giant axonal neuropathy                                                                 | 2.13 | < 0.001 |
| <i>Nr2f2</i>         | nuclear receptor subfamily 2, group F, member 2                                         | 2.13 | < 0.001 |
| <i>Usp37</i>         | ubiquitin specific peptidase 37                                                         | 2.13 | < 0.001 |

|                      |                                                                                                                      |      |         |
|----------------------|----------------------------------------------------------------------------------------------------------------------|------|---------|
| <i>Eif2c3</i>        | eukaryotic translation initiation factor 2C, 3                                                                       | 2.15 | < 0.001 |
| <i>Zbtb7a</i>        | zinc finger and BTB domain containing 7a                                                                             | 2.15 | < 0.001 |
| <i>Zfp207</i>        | zinc finger protein 207                                                                                              | 2.16 | < 0.001 |
| <i>Rapgef6</i>       | Rap guanine nucleotide exchange factor (GEF) 6                                                                       | 2.17 | < 0.001 |
| <i>Snopc5</i>        | small nuclear RNA activating complex, polypeptide 5                                                                  | 2.17 | < 0.001 |
| <i>4933407K13Rik</i> | RIKEN cDNA 4933407K13 gene                                                                                           | 2.18 | < 0.001 |
| <i>Sord</i>          | sorbitol dehydrogenase                                                                                               | 2.18 | < 0.001 |
| <i>Tle4</i>          | transducin-like enhancer of split 4, homolog of Drosophila E(spl)                                                    | 2.18 | 0.085   |
| <i>Rbm26</i>         | RNA binding motif protein 26                                                                                         | 2.18 | < 0.001 |
| <i>6430548M08Rik</i> | RIKEN cDNA 6430548M08 gene                                                                                           | 2.19 | < 0.001 |
| <i>4833420G17Rik</i> | RIKEN cDNA 4833420G17 gene                                                                                           | 2.20 | < 0.001 |
| <i>Casc4</i>         | cancer susceptibility candidate 4                                                                                    | 2.21 | < 0.001 |
| <i>Ammecr1</i>       | Alport syndrome, mental retardation, midface hypoplasia and elliptocytosis chromosomal region gene 1 homolog (human) | 2.21 | < 0.001 |
| <i>A930038C07Rik</i> | RIKEN cDNA A930038C07 gene                                                                                           | 2.22 | < 0.001 |
| <i>Gria3</i>         | glutamate receptor, ionotropic, AMPA3 (alpha 3)                                                                      | 2.22 | < 0.001 |
| <i>Fam117b</i>       | family with sequence similarity 117, member B                                                                        | 2.22 | < 0.001 |
| <i>Sfi1</i>          | Sfi1 homolog, spindle assembly associated (yeast)                                                                    | 2.24 | < 0.001 |
| <i>Rap2b</i>         | RAP2B, member of RAS oncogene family                                                                                 | 2.24 | < 0.001 |
| <i>Epn2</i>          | epsin 2                                                                                                              | 2.24 | < 0.001 |
| <i>AU018466</i>      | expressed sequence AU018466                                                                                          | 2.25 | < 0.001 |
| <i>Sema6d</i>        | sema domain, transmembrane domain (TM), and cytoplasmic domain, (semaphorin) 6D                                      | 2.25 | 0.085   |
| <i>Zbtb16</i>        | zinc finger and BTB domain containing 16                                                                             | 2.26 | < 0.001 |
| <i>Atp11c</i>        | ATPase, class VI, type 11C                                                                                           | 2.26 | < 0.001 |
| <i>C78505</i>        | expressed sequence C78505                                                                                            | 2.27 | < 0.001 |
| <i>Rian</i>          | RNA imprinted and accumulated in nucleus                                                                             | 2.27 | 0.085   |
| <i>Arrdc3</i>        | arrestin domain containing 3                                                                                         | 2.28 | < 0.001 |
| <i>C77405</i>        | expressed sequence C77405                                                                                            | 2.29 | < 0.001 |
| <i>Ccr11</i>         | chemokine (C-C motif) receptor-like 1                                                                                | 2.32 | 0.085   |
| <i>Cml3</i>          | camello-like 3                                                                                                       | 2.33 | < 0.001 |
| <i>Gm10883</i>       | predicted gene 10883                                                                                                 | 2.33 | < 0.001 |
| <i>Gnal</i>          | guanine nucleotide binding protein, alpha stimulating, olfactory type                                                | 2.33 | < 0.001 |
| <i>Clec16a</i>       | C-type lectin domain family 16, member A                                                                             | 2.33 | < 0.001 |
| <i>E130012A19Rik</i> | RIKEN cDNA E130012A19 gene                                                                                           | 2.33 | < 0.001 |
| <i>Scaper</i>        | S phase cyclin A-associated protein in the ER                                                                        | 2.37 | < 0.001 |
| <i>D5Ert579e</i>     | DNA segment, Chr 5, ERATO Doi 579, expressed                                                                         | 2.38 | < 0.001 |
| <i>Malat1</i>        | metastasis associated lung adenocarcinoma transcript 1 (non-coding RNA)                                              | 2.38 | < 0.001 |
| <i>C80425</i>        | expressed sequence C80425                                                                                            | 2.39 | < 0.001 |
| <i>Nnt</i>           | nicotinamide nucleotide transhydrogenase                                                                             | 2.40 | < 0.001 |
| <i>Crkrs</i>         | CDC2-related kinase, arginine/serine-rich                                                                            | 2.41 | < 0.001 |
| <i>Usp15</i>         | ubiquitin specific peptidase 15                                                                                      | 2.41 | < 0.001 |
| <i>Acbd3</i>         | acyl-Coenzyme A binding domain containing 3                                                                          | 2.42 | < 0.001 |
| <i>Zfx</i>           | zinc finger protein X-linked                                                                                         | 2.42 | < 0.001 |
| <i>Mbnl1</i>         | muscleblind-like 1 (Drosophila)                                                                                      | 2.45 | < 0.001 |
| <i>Dnmt1</i>         | DNA methyltransferase (cytosine-5) 1                                                                                 | 2.46 | < 0.001 |
| <i>2610020P09Rik</i> | RIKEN cDNA 2610020P09 gene                                                                                           | 2.48 | < 0.001 |

|                      |                                                                                          |      |         |
|----------------------|------------------------------------------------------------------------------------------|------|---------|
| <i>Ylpm1</i>         | YLP motif containing 1                                                                   | 2.49 | < 0.001 |
| <i>Gabpb2</i>        | GA repeat binding protein, beta 2                                                        | 2.49 | < 0.001 |
| <i>Cysl</i>          | cystin 1                                                                                 | 2.52 | < 0.001 |
| <i>Dbp</i>           | D site albumin promoter binding protein                                                  | 2.55 | < 0.001 |
| <i>Baz2a</i>         | bromodomain adjacent to zinc finger domain, 2A                                           | 2.57 | < 0.001 |
| <i>Plcb4</i>         | phospholipase C, beta 4                                                                  | 2.57 | < 0.001 |
| <i>Tnrc18</i>        | trinucleotide repeat containing 18                                                       | 2.58 | < 0.001 |
| <i>Elk3</i>          | ELK3, member of ETS oncogene family                                                      | 2.58 | < 0.001 |
| <i>Fbxo32</i>        | F-box protein 32                                                                         | 2.59 | < 0.001 |
| <i>Ngp</i>           | neutrophilic granule protein                                                             | 2.59 | 0.085   |
| <i>Sfpq</i>          | splicing factor proline/glutamine rich (polypyrimidine tract binding protein associated) | 2.63 | < 0.001 |
| <i>Tdo2</i>          | tryptophan 2,3-dioxygenase                                                               | 2.63 | < 0.001 |
| <i>5830407P18Rik</i> | RIKEN cDNA 5830407P18 gene                                                               | 2.66 | < 0.001 |
| <i>Trpm7</i>         | transient receptor potential cation channel, subfamily M, member 7                       | 2.67 | < 0.001 |
| <i>Cbx5</i>          | chromobox homolog 5 (Drosophila HP1a)                                                    | 2.67 | < 0.001 |
| <i>Vps4b</i>         | vacuolar protein sorting 4b (yeast)                                                      | 2.68 | < 0.001 |
| <i>BC005685</i>      | cDNA sequence BC005685                                                                   | 2.71 | < 0.001 |
| <i>Igh</i>           | immunoglobulin heavy chain complex                                                       | 2.73 | < 0.001 |
| <i>Per3</i>          | period homolog 3 (Drosophila)                                                            | 2.75 | < 0.001 |
| <i>LOC667118</i>     | zinc finger, BED domain containing 4 pseudogene                                          | 2.77 | < 0.001 |
| <i>Tef</i>           | thyrotroph embryonic factor                                                              | 2.78 | < 0.001 |
| <i>Hjrp</i>          | Holliday junction recognition protein                                                    | 2.82 | < 0.001 |
| <i>2610024D14Rik</i> | RIKEN cDNA 2610024D14 gene                                                               | 2.89 | < 0.001 |
| <i>Stfa2l1</i>       | stefin A2 like 1                                                                         | 2.94 | < 0.001 |
| <i>Zfp101</i>        | zinc finger protein 101                                                                  | 2.94 | < 0.001 |
| <i>Utrn</i>          | utrophin                                                                                 | 2.96 | < 0.001 |
| <i>2610301F02Rik</i> | RIKEN cDNA 2610301F02 gene                                                               | 3.03 | < 0.001 |
| <i>NA</i>            | NA                                                                                       | 3.08 | 0.085   |
| <i>Cep110</i>        | centrosomal protein 110                                                                  | 3.16 | < 0.001 |
| <i>Mga</i>           | MAX gene associated                                                                      | 3.30 | < 0.001 |
| <i>Airn</i>          | antisense Igf2r RNA                                                                      | 3.33 | < 0.001 |
| <i>4921513D23Rik</i> | RIKEN cDNA 4921513D23 gene                                                               | 3.34 | < 0.001 |
| <i>Hlf</i>           | hepatic leukemia factor                                                                  | 3.34 | < 0.001 |
| <i>Crebbp</i>        | CREB binding protein                                                                     | 3.40 | < 0.001 |
| <i>Slc15a2</i>       | solute carrier family 15 (H+/peptide transporter), member 2                              | 3.59 | < 0.001 |
| <i>Cd163l1</i>       | CD163 molecule-like 1                                                                    | 3.61 | < 0.001 |
| <i>Nckap1l</i>       | NCK associated protein 1 like                                                            | 3.74 | < 0.001 |
| <i>Mid1</i>          | midline 1                                                                                | 3.77 | < 0.001 |
| <i>Dab2ip</i>        | disabled homolog 2 (Drosophila) interacting protein                                      | 3.81 | < 0.001 |
| <i>Bat2d</i>         | BAT2 domain containing 1                                                                 | 3.94 | < 0.001 |
| <i>Dnmt3a</i>        | DNA methyltransferase 3A                                                                 | 4.15 | < 0.001 |
| <i>Plec1</i>         | plectin 1                                                                                | 5.21 | < 0.001 |
| <i>Ighg</i>          | Immunoglobulin heavy chain (gamma polypeptide)                                           | 5.29 | < 0.001 |
| <i>Igj</i>           | immunoglobulin joining chain                                                             | 8.34 | < 0.001 |

<sup>a</sup> FC: fold change, which is calculated by dividing the expression in VILI-exposed nmMLCK KO mice by the expression in WT VILI-exposed mice.
