# Supplementary material for: Genes Influenced by the Non-Muscle Isoform of Myosin Light Chain Kinase Impact Human Cancer Prognosis
Source: PubMed Central journal article supplement (PMC3979809; doi:10.1371/journal.pone.0094325), 2014-04-08
Supplement: pone.0094325.s007.pdf [file pone.0094325.s007.pdf]

Table S2. Differentially expressed genes between WT control and VILI-exposed WT mice

| Gene symbol              | Gene title                                                                                                         | FC <sup>a</sup> | FDR (%) |
|--------------------------|--------------------------------------------------------------------------------------------------------------------|-----------------|---------|
| <i>Zfp467</i>            | zinc finger protein 467                                                                                            | 0.05            | 0.0     |
| <i>Hspa1a</i>            | heat shock protein 1A                                                                                              | 0.06            | 0.0     |
| <i>Hspa1b</i>            | heat shock protein 1B                                                                                              | 0.06            | 0.0     |
| <i>Gm1337</i>            | predicted gene 1337                                                                                                | 0.07            | 0.0     |
| <i>Gm15453 /// Rbm3</i>  | predicted gene 15453 /// RNA binding motif protein 3                                                               | 0.09            | 0.0     |
| <i>Dbp</i>               | D site albumin promoter binding protein                                                                            | 0.10            | 0.0     |
| <i>Car3</i>              | carbonic anhydrase 3                                                                                               | 0.13            | 0.0     |
| <i>Gm8267</i>            | predicted gene 8267                                                                                                | 0.15            | 0.0     |
| <i>Foxj1</i>             | forkhead box J1                                                                                                    | 0.18            | 0.0     |
| <i>Sox18</i>             | SRY-box containing gene 18                                                                                         | 0.19            | 0.0     |
| <i>Per3</i>              | Period homolog 3 (Drosophila)                                                                                      | 0.19            | 0.0     |
| <i>2210020M01Rik</i>     | RIKEN cDNA 2210020M01 gene                                                                                         | 0.19            | 0.0     |
| <i>Fbxo30</i>            | F-box protein 30                                                                                                   | 0.20            | 0.0     |
| <i>Klhdc5</i>            | kelch domain containing 5                                                                                          | 0.20            | 0.0     |
| <i>Akap14</i>            | A kinase (PRKA) anchor protein 14                                                                                  | 0.20            | 0.0     |
| <i>Fam13a</i>            | family with sequence similarity 13, member A                                                                       | 0.21            | 0.0     |
| <i>Klf2</i>              | Kruppel-like factor 2 (lung)                                                                                       | 0.21            | 0.0     |
| <i>2810055F11Rik</i>     | RIKEN cDNA 2810055F11 gene                                                                                         | 0.21            | 0.0     |
| <i>Cyp2a4 /// Cyp2a5</i> | cytochrome P450, family 2, subfamily a, polypeptide 4 ///<br>cytochrome P450, family 2, subfamily a, polypeptide 5 | 0.21            | 0.0     |
| <i>Thap2</i>             | THAP domain containing, apoptosis associated protein 2                                                             | 0.22            | 0.0     |
| <i>Ggtal</i>             | glycoprotein galactosyltransferase alpha 1, 3                                                                      | 0.22            | 0.0     |
| <i>Rassf9</i>            | Ras association (RalGDS/AF-6) domain family (N-terminal) member 9                                                  | 0.23            | 0.0     |
| <i>Ptger2</i>            | prostaglandin E receptor 2 (subtype EP2)                                                                           | 0.23            | 0.0     |
| <i>Zfp667</i>            | zinc finger protein 667                                                                                            | 0.23            | 0.0     |
| <i>6720407P12Rik</i>     | RIKEN cDNA 6720407P12 gene                                                                                         | 0.23            | 0.0     |
| <i>Ccdc25</i>            | coiled-coil domain containing 25                                                                                   | 0.23            | 0.0     |
| <i>Tppp</i>              | tubulin polymerization promoting protein                                                                           | 0.23            | 0.0     |
| <i>Rreb1</i>             | ras responsive element binding protein 1                                                                           | 0.23            | 0.0     |
| <i>Ttc3</i>              | tetratricopeptide repeat domain 3                                                                                  | 0.24            | 0.0     |
| <i>Myb</i>               | myeloblastosis oncogene                                                                                            | 0.24            | 0.0     |
| <i>AU021034</i>          | expressed sequence AU021034                                                                                        | 0.24            | 0.0     |
| <i>Gpr182</i>            | G protein-coupled receptor 182                                                                                     | 0.24            | 0.0     |
| <i>Fam47e</i>            | family with sequence similarity 47, member E                                                                       | 0.24            | 0.0     |
| <i>A430108G06Rik</i>     | RIKEN cDNA A430108G06 gene                                                                                         | 0.24            | 0.0     |
| <i>Capn5</i>             | calpain 5                                                                                                          | 0.25            | 0.0     |
| <i>2900006K08Rik</i>     | RIKEN cDNA 2900006K08 gene                                                                                         | 0.25            | 0.0     |
| <i>D4Wsu53e</i>          | DNA segment, Chr 4, Wayne State University 53,<br>expressed                                                        | 0.26            | 0.0     |
| <i>4930451C15Rik</i>     | RIKEN cDNA 4930451C15 gene                                                                                         | 0.26            | 0.0     |
| <i>Nck1</i>              | non-catalytic region of tyrosine kinase adaptor protein 1                                                          | 0.26            | 0.0     |
| <i>Npy1r</i>             | neuropeptide Y receptor Y1                                                                                         | 0.26            | 0.0     |
| <i>Calcr1</i>            | calcitonin receptor-like                                                                                           | 0.26            | 0.0     |
| <i>Thsd1</i>             | thrombospondin, type I, domain 1                                                                                   | 0.26            | 0.0     |
| <i>Tekt4</i>             | tektin 4                                                                                                           | 0.27            | 0.0     |

|                      |                                                                      |      |     |
|----------------------|----------------------------------------------------------------------|------|-----|
| <i>2210019G11Rik</i> | RIKEN cDNA 2210019G11 gene                                           | 0.27 | 0.0 |
| <i>Kank4</i>         | KN motif and ankyrin repeat domains 4                                | 0.27 | 0.0 |
| <i>Dcdc2b</i>        | doublecortin domain containing 2b                                    | 0.27 | 0.0 |
| <i>A330076H08Rik</i> | RIKEN cDNA A330076H08 gene                                           | 0.27 | 0.0 |
| <i>Cml3</i>          | camello-like 3                                                       | 0.27 | 0.0 |
| <i>Lrrc36</i>        | leucine rich repeat containing 36                                    | 0.27 | 0.0 |
| <i>Fads6</i>         | fatty acid desaturase domain family, member 6                        | 0.27 | 0.0 |
| <i>Polk</i>          | polymerase (DNA directed), kappa                                     | 0.28 | 0.0 |
| <i>Ubxn10</i>        | UBX domain protein 10                                                | 0.28 | 0.0 |
| <i>H2-T24</i>        | histocompatibility 2, T region locus 24                              | 0.28 | 0.0 |
| <i>A530020G20Rik</i> | RIKEN cDNA A530020G20 gene                                           | 0.28 | 0.0 |
| <i>Atat1</i>         | alpha tubulin acetyltransferase 1                                    | 0.28 | 0.0 |
| <i>D630039A03Rik</i> | RIKEN cDNA D630039A03 gene                                           | 0.29 | 0.0 |
| <i>Dnajb1</i>        | DnaJ (Hsp40) homolog, subfamily B, member 1                          | 0.29 | 0.0 |
| <i>2010007H06Rik</i> | RIKEN cDNA 2010007H06 gene                                           | 0.29 | 0.0 |
| <i>N4bp3</i>         | NEDD4 binding protein 3                                              | 0.29 | 0.0 |
| <i>Grtp1</i>         | GH regulated TBC protein 1                                           | 0.29 | 0.0 |
| <i>Meox2</i>         | mesenchyme homeobox 2                                                | 0.29 | 0.0 |
| <i>Stard9</i>        | START domain containing 9                                            | 0.29 | 0.0 |
| <i>4833427G06Rik</i> | RIKEN cDNA 4833427G06 gene                                           | 0.29 | 0.0 |
| <i>Dyx1c1</i>        | dyslexia susceptibility 1 candidate 1 homolog (human)                | 0.29 | 0.0 |
| <i>Lrrc17</i>        | leucine rich repeat containing 17                                    | 0.29 | 0.0 |
| <i>Cys1</i>          | cystin 1                                                             | 0.29 | 0.0 |
| <i>Hlf</i>           | hepatic leukemia factor                                              | 0.30 | 0.0 |
| <i>Kif26b</i>        | kinesin family member 26B                                            | 0.30 | 0.0 |
| <i>Ube2b</i>         | ubiquitin-conjugating enzyme E2B                                     | 0.30 | 0.0 |
| <i>Hspa12b</i>       | heat shock protein 12B                                               | 0.30 | 0.0 |
| <i>Zfp420</i>        | zinc finger protein 420                                              | 0.31 | 7.8 |
| <i>Agphd1</i>        | aminoglycoside phosphotransferase domain containing 1                | 0.31 | 0.0 |
| <i>Chchd7</i>        | Coiled-coil-helix-coiled-coil-helix domain containing 7              | 0.31 | 0.0 |
| <i>Uty</i>           | ubiquitously transcribed tetratricopeptide repeat gene, Y chromosome | 0.31 | 0.0 |
| <i>Zbtb46</i>        | zinc finger and BTB domain containing 46                             | 0.31 | 0.0 |
| <i>Senp7</i>         | SUMO1/sentrin specific peptidase 7                                   | 0.31 | 0.0 |
| <i>Cep70</i>         | centrosomal protein 70                                               | 0.31 | 0.0 |
| <i>Mxi1</i>          | Max interacting protein 1                                            | 0.31 | 0.0 |
| <i>Zfp760</i>        | zinc finger protein 760                                              | 0.31 | 0.0 |
| <i>Fgfr3</i>         | fibroblast growth factor receptor 3                                  | 0.31 | 0.0 |
| <i>Herc6</i>         | hect domain and RLD 6                                                | 0.31 | 0.0 |
| <i>Fhl1</i>          | four and a half LIM domains 1                                        | 0.32 | 0.0 |
| <i>Caps2</i>         | calcyphosphine 2                                                     | 0.32 | 0.0 |
| <i>Hdac11</i>        | histone deacetylase 11                                               | 0.32 | 0.0 |
| <i>Prr18</i>         | proline rich region 18                                               | 0.32 | 0.0 |
| <i>1190005F20Rik</i> | RIKEN cDNA 1190005F20 gene                                           | 0.32 | 0.0 |
| <i>Ezh1</i>          | enhancer of zeste homolog 1 (Drosophila)                             | 0.32 | 0.0 |
| <i>Tcf21</i>         | transcription factor 21                                              | 0.32 | 0.0 |
| <i>Mtus2</i>         | microtubule associated tumor suppressor candidate 2                  | 0.32 | 0.0 |
| <i>5430414B12Rik</i> | RIKEN cDNA 5430414B12 gene                                           | 0.32 | 0.0 |
| <i>BB182297</i>      | expressed sequence BB182297                                          | 0.32 | 0.0 |
| <i>Fam55c</i>        | family with sequence similarity 55, member C                         | 0.32 | 0.0 |

|                                                  |                                                                                                     |      |     |
|--------------------------------------------------|-----------------------------------------------------------------------------------------------------|------|-----|
| <i>Igh-VJ558 /// Igha</i>                        | immunoglobulin heavy chain (J558 family) /// immunoglobulin heavy constant alpha                    | 0.33 | 7.8 |
| <i>6430706D22Rik /// A730008H23Rik /// Hjurp</i> | RIKEN cDNA 6430706D22 gene /// RIKEN cDNA A730008H23 gene /// Holliday junction recognition protein | 0.33 | 0.0 |
| <i>Wdr19</i>                                     | WD repeat domain 19                                                                                 | 0.33 | 0.0 |
| <i>Zxdc</i>                                      | ZXD family zinc finger C                                                                            | 0.33 | 2.8 |
| <i>9130015G15Rik</i>                             | RIKEN cDNA 9130015G15 gene                                                                          | 0.33 | 0.0 |
| <i>2810055G20Rik</i>                             | RIKEN cDNA 2810055G20 gene                                                                          | 0.33 | 0.0 |
| <i>Fancc</i>                                     | Fanconi anemia, complementation group C                                                             | 0.33 | 0.0 |
| <i>Trim14</i>                                    | tripartite motif-containing 14                                                                      | 0.34 | 0.0 |
| <i>Prrx1</i>                                     | paired related homeobox 1                                                                           | 0.34 | 0.0 |
| <i>Agbl5</i>                                     | ATP/GTP binding protein-like 5                                                                      | 0.34 | 0.0 |
| <i>Kcna2</i>                                     | potassium voltage-gated channel, shaker-related subfamily, member 2                                 | 0.34 | 0.0 |
| <i>Pla2g15</i>                                   | phospholipase A2, group XV                                                                          | 0.34 | 0.0 |
| <i>E130308A19Rik</i>                             | RIKEN cDNA E130308A19 gene                                                                          | 0.34 | 0.0 |
| <i>Dusp19</i>                                    | dual specificity phosphatase 19                                                                     | 0.34 | 2.8 |
| <i>Mdh1b</i>                                     | malate dehydrogenase 1B, NAD (soluble)                                                              | 0.34 | 0.0 |
| <i>Ints3</i>                                     | integrator complex subunit 3                                                                        | 0.34 | 0.0 |
| <i>Cd59a</i>                                     | CD59a antigen                                                                                       | 0.34 | 0.0 |
| <i>Mettl8</i>                                    | methyltransferase like 8                                                                            | 0.34 | 0.0 |
| <i>4932425I24Rik</i>                             | RIKEN cDNA 4932425I24 gene                                                                          | 0.35 | 0.0 |
| <i>Map3k12</i>                                   | mitogen-activated protein kinase kinase kinase 12                                                   | 0.35 | 0.0 |
| <i>Rps6ka5</i>                                   | ribosomal protein S6 kinase, polypeptide 5                                                          | 0.35 | 0.0 |
| <i>4833442J19Rik</i>                             | RIKEN cDNA 4833442J19 gene                                                                          | 0.35 | 0.0 |
| <i>Rab36</i>                                     | RAB36, member RAS oncogene family                                                                   | 0.35 | 0.0 |
| <i>Plekha2</i>                                   | pleckstrin homology domain-containing, family A (phosphoinositide binding specific) member 2        | 0.35 | 0.0 |
| <i>Tead2</i>                                     | TEA domain family member 2                                                                          | 0.35 | 0.0 |
| <i>Dixdc1</i>                                    | DIX domain containing 1                                                                             | 0.35 | 0.0 |
| <i>Fmo5</i>                                      | flavin containing monooxygenase 5                                                                   | 0.36 | 0.0 |
| <i>Zfp54</i>                                     | zinc finger protein 54                                                                              | 0.36 | 0.0 |
| <i>Bivm</i>                                      | basic, immunoglobulin-like variable motif containing                                                | 0.36 | 0.0 |
| <i>6330439K17Rik</i>                             | RIKEN cDNA 6330439K17 gene                                                                          | 0.36 | 0.0 |
| <i>Snapc3</i>                                    | small nuclear RNA activating complex, polypeptide 3                                                 | 0.36 | 0.0 |
| <i>Ripply3</i>                                   | rippy3 homolog (zebrafish)                                                                          | 0.36 | 0.0 |
| <i>Asb14</i>                                     | ankyrin repeat and SOCS box-containing 14                                                           | 0.36 | 0.0 |
| <i>Tet1</i>                                      | tet methylcytosine dioxygenase 1                                                                    | 0.36 | 0.0 |
| <i>Stk33</i>                                     | serine/threonine kinase 33                                                                          | 0.37 | 0.0 |
| <i>Nek1</i>                                      | NIMA (never in mitosis gene a)-related expressed kinase 1                                           | 0.37 | 0.0 |
| <i>Smad6</i>                                     | SMAD family member 6                                                                                | 0.37 | 0.0 |
| <i>Rsph4a</i>                                    | radial spoke head 4 homolog A (Chlamydomonas)                                                       | 0.37 | 0.0 |
| <i>Tfb1m</i>                                     | transcription factor B1, mitochondrial                                                              | 0.37 | 0.0 |
| <i>Ces1f</i>                                     | carboxylesterase 1F                                                                                 | 0.37 | 0.0 |
| <i>Wdyhv1</i>                                    | WDYHV motif containing 1                                                                            | 0.37 | 0.0 |
| <i>Rab38</i>                                     | RAB38, member of RAS oncogene family                                                                | 0.37 | 0.0 |
| <i>Rasgef1a</i>                                  | RasGEF domain family, member 1A                                                                     | 0.37 | 0.0 |
| <i>Dtna</i>                                      | dystrobrevin alpha                                                                                  | 0.37 | 0.0 |

|                            |                                                               |      |     |
|----------------------------|---------------------------------------------------------------|------|-----|
| <i>Ak3</i>                 | adenylate kinase 3                                            | 0.37 | 0.0 |
| <i>Gm129</i>               | predicted gene 129                                            | 0.37 | 0.0 |
| <i>Nr1d2</i>               | nuclear receptor subfamily 1, group D, member 2               | 0.38 | 0.0 |
| <i>Tnfsf10</i>             | tumor necrosis factor (ligand) superfamily, member 10         | 0.38 | 2.8 |
| <i>C80889</i>              | expressed sequence C80889                                     | 0.38 | 0.0 |
| <i>Hist3h2a</i>            | histone cluster 3, H2a                                        | 0.38 | 0.0 |
| <i>Amigo2</i>              | adhesion molecule with Ig like domain 2                       | 0.38 | 0.0 |
| <i>Ttc21b</i>              | tetratricopeptide repeat domain 21B                           | 0.38 | 0.0 |
| <i>Zfp934</i>              | zinc finger protein 934                                       | 0.38 | 0.0 |
| <i>Slc15a2</i>             | solute carrier family 15 (H+/peptide transporter), member 2   | 0.38 | 2.8 |
| <i>Nudt7</i>               | nudix (nucleoside diphosphate linked moiety X)-type motif 7   | 0.38 | 0.0 |
| <i>9430047G12Rik</i>       | RIKEN cDNA 9430047G12 gene                                    | 0.38 | 0.0 |
| <i>Wrn</i>                 | Werner syndrome homolog (human)                               | 0.38 | 0.0 |
| <i>Kctd21</i>              | potassium channel tetramerisation domain containing 21        | 0.38 | 0.0 |
| <i>Calhm2</i>              | calcium homeostasis modulator 2                               | 0.38 | 0.0 |
| <i>Gm5595</i>              | predicted gene 5595                                           | 0.38 | 0.0 |
| <i>A130004G11Rik</i>       | RIKEN cDNA A130004G11 gene                                    | 0.38 | 0.0 |
| <i>Tslp</i>                | thymic stromal lymphopietin                                   | 0.38 | 0.0 |
| <i>Plscr4</i>              | phospholipid scramblase 4                                     | 0.38 | 0.0 |
| <i>A730054J21Rik</i>       | RIKEN cDNA A730054J21 gene                                    | 0.38 | 0.0 |
| <i>Kank3</i>               | KN motif and ankyrin repeat domains 3                         | 0.39 | 0.0 |
| <i>Rarg</i>                | retinoic acid receptor, gamma                                 | 0.39 | 0.0 |
| <i>Pknox2</i>              | Pbx/knotted 1 homeobox 2                                      | 0.39 | 0.0 |
| <i>Il17rd</i>              | interleukin 17 receptor D                                     | 0.39 | 0.0 |
| <i>Ankrd26</i>             | ankyrin repeat domain 26                                      | 0.39 | 0.0 |
| <i>Lyl1</i>                | lymphoblastomic leukemia 1                                    | 0.39 | 0.0 |
| <i>Efcab1</i>              | EF hand calcium binding domain 1                              | 0.39 | 0.0 |
| <i>Edc3</i>                | enhancer of mRNA decapping 3 homolog ( <i>S. cerevisiae</i> ) | 0.39 | 0.0 |
| <i>Phf21a</i>              | PHD finger protein 21A                                        | 0.39 | 0.0 |
| <i>Lrrc51</i>              | leucine rich repeat containing 51                             | 0.39 | 0.0 |
| <i>Tmem206</i>             | transmembrane protein 206                                     | 0.39 | 2.8 |
| <i>Hist3h2a /// Trim17</i> | histone cluster 3, H2a /// tripartite motif-containing 17     | 0.39 | 0.0 |
| <i>Yes1</i>                | Yamaguchi sarcoma viral (v-yes) oncogene homolog 1            | 0.39 | 0.0 |
| <i>Il15</i>                | interleukin 15                                                | 0.39 | 0.0 |
| <i>G0s2</i>                | G0/G1 switch gene 2                                           | 0.39 | 0.0 |
| <i>Mns1</i>                | meiosis-specific nuclear structural protein 1                 | 0.39 | 0.0 |
| <i>AA386476 ///</i>        | expressed sequence AA386476 /// uncharacterized               | 0.40 | 0.0 |
| <i>LOC100504975</i>        | LOC100504975                                                  |      |     |
| <i>Arhgap12</i>            | Rho GTPase activating protein 12                              | 0.40 | 0.0 |
| <i>Dnmt3a</i>              | DNA methyltransferase 3A                                      | 0.40 | 0.0 |
| <i>Hs1bp3</i>              | HCLS1 binding protein 3                                       | 0.40 | 0.0 |
| <i>9430020K01Rik</i>       | RIKEN cDNA 9430020K01 gene                                    | 0.40 | 0.0 |
| <i>Slc46a3</i>             | solute carrier family 46, member 3                            | 0.40 | 0.0 |
| <i>Ip6k2</i>               | inositol hexaphosphate kinase 2                               | 0.40 | 0.0 |
| <i>Trp53bp1</i>            | transformation related protein 53 binding protein 1           | 0.40 | 2.8 |
| <i>Zfp846</i>              | zinc finger protein 846                                       | 0.40 | 0.0 |
| <i>Cckar</i>               | cholecystokinin A receptor                                    | 0.40 | 0.0 |
| <i>Cdon</i>                | cell adhesion molecule-related/down-regulated by              | 0.40 | 0.0 |

|                              | oncogenes                                                                  |      |     |
|------------------------------|----------------------------------------------------------------------------|------|-----|
| <i>Cd97</i>                  | CD97 antigen                                                               | 0.40 | 0.0 |
| <i>1700013F07Rik</i>         | RIKEN cDNA 1700013F07 gene                                                 | 0.40 | 0.0 |
| <i>Nab2</i>                  | Ngfi-A binding protein 2                                                   | 0.40 | 2.8 |
| <i>Card10</i>                | caspase recruitment domain family, member 10                               | 0.40 | 0.0 |
| <i>Klhl24</i>                | kelch-like 24 (Drosophila)                                                 | 0.40 | 0.0 |
| <i>Lpar3</i>                 | lysophosphatidic acid receptor 3                                           | 0.40 | 0.0 |
| <i>Six5</i>                  | sine oculis-related homeobox 5 homolog (Drosophila)                        | 0.40 | 0.0 |
| <i>Zfp82</i>                 | zinc finger protein 82                                                     | 0.40 | 7.8 |
| <i>C77648</i>                | expressed sequence C77648                                                  | 0.40 | 0.0 |
| <i>Sigmar1</i>               | sigma non-opioid intracellular receptor 1                                  | 0.41 | 2.8 |
| <i>Wdr78</i>                 | WD repeat domain 78                                                        | 0.41 | 0.0 |
| <i>Dynlt1f</i>               | dynein light chain Tctex-type 1F                                           | 0.41 | 0.0 |
| <i>Ccdc141</i>               | coiled-coil domain containing 141                                          | 0.41 | 7.8 |
| <i>Gemin8</i>                | gem (nuclear organelle) associated protein 8                               | 0.41 | 0.0 |
| <i>Senp8</i>                 | SUMO/sentrin specific peptidase 8                                          | 0.41 | 2.8 |
| <i>Ttc14</i>                 | tetratricopeptide repeat domain 14                                         | 0.41 | 0.0 |
| <i>Purg</i>                  | purine-rich element binding protein G                                      | 0.41 | 0.0 |
| <i>Frem1</i>                 | Fras1 related extracellular matrix protein 1                               | 0.41 | 0.0 |
| <i>D730048J04Rik</i>         | RIKEN cDNA D730048J04 gene                                                 | 0.41 | 0.0 |
| <i>Ganc</i>                  | glucosidase, alpha; neutral C                                              | 0.41 | 0.0 |
| <i>Shisa2</i>                | shisa homolog 2 (Xenopus laevis)                                           | 0.41 | 0.0 |
| <i>Zfp790</i>                | zinc finger protein 790                                                    | 0.41 | 0.0 |
| <i>Gm5918</i>                | predicted gene 5918                                                        | 0.41 | 0.0 |
| <i>Glis2</i>                 | GLIS family zinc finger 2                                                  | 0.41 | 0.0 |
| <i>Ccdc28b</i>               | coiled coil domain containing 28B                                          | 0.41 | 0.0 |
| <i>Cc2d2a</i>                | coiled-coil and C2 domain containing 2A                                    | 0.41 | 0.0 |
| <i>BC046404</i>              | cDNA sequence BC046404                                                     | 0.41 | 7.8 |
| <i>Eef2k</i>                 | eukaryotic elongation factor-2 kinase                                      | 0.41 | 0.0 |
| <i>Wscd1</i>                 | WSC domain containing 1                                                    | 0.41 | 0.0 |
| <i>Grrp1</i>                 | glycine/arginine rich protein 1                                            | 0.42 | 0.0 |
| <i>1700049G17Rik</i>         | RIKEN cDNA 1700049G17 gene                                                 | 0.42 | 0.0 |
| <i>Ccdc30</i>                | coiled-coil domain containing 30                                           | 0.42 | 0.0 |
| <i>Rnf186</i>                | ring finger protein 186                                                    | 0.42 | 0.0 |
| <i>Sox17</i>                 | SRY-box containing gene 17                                                 | 0.42 | 0.0 |
| <i>LOC100861749 /// Sfi1</i> | protein SFI1 homolog /// Sfi1 homolog, spindle assembly associated (yeast) | 0.42 | 0.0 |
| <i>Nudcd1</i>                | NudC domain containing 1                                                   | 0.42 | 0.0 |
| <i>Trim37</i>                | tripartite motif-containing 37                                             | 0.42 | 0.0 |
| <i>Rab2b</i>                 | RAB2B, member RAS oncogene family                                          | 0.42 | 0.0 |
| <i>Zfp266</i>                | zinc finger protein 266                                                    | 0.42 | 0.0 |
| <i>Aspa</i>                  | aspartoacylase                                                             | 0.42 | 0.0 |
| <i>Fgfr4</i>                 | fibroblast growth factor receptor 4                                        | 0.42 | 0.0 |
| <i>Hibch</i>                 | 3-hydroxyisobutyryl-Coenzyme A hydrolase                                   | 0.42 | 0.0 |
| <i>Per2</i>                  | period homolog 2 (Drosophila)                                              | 0.42 | 0.0 |
| <i>Dnali1</i>                | dynein, axonemal, light intermediate polypeptide 1                         | 0.42 | 0.0 |
| <i>Zfp524</i>                | zinc finger protein 524                                                    | 0.42 | 0.0 |
| <i>Gm11944</i>               | predicted gene 11944                                                       | 0.42 | 0.0 |
| <i>Pcdh18</i>                | protocadherin 18                                                           | 0.42 | 0.0 |
| <i>Sord</i>                  | sorbitol dehydrogenase                                                     | 0.42 | 0.0 |

|                              |                                                                                                |      |     |
|------------------------------|------------------------------------------------------------------------------------------------|------|-----|
| <i>Fzd7</i>                  | frizzled homolog 7 (Drosophila)                                                                | 0.42 | 0.0 |
| <i>Gm626</i>                 | predicted gene 626                                                                             | 0.42 | 0.0 |
| <i>Cep350</i>                | centrosomal protein 350                                                                        | 0.42 | 0.0 |
| <i>Vps13a</i>                | vacuolar protein sorting 13A (yeast)                                                           | 0.43 | 0.0 |
| <i>4922501C03Rik</i>         | RIKEN cDNA 4922501C03 gene                                                                     | 0.43 | 0.0 |
| <i>Dleu2</i>                 | deleted in lymphocytic leukemia, 2                                                             | 0.43 | 2.8 |
| <i>Hyal1 /// Nat6</i>        | hyaluronoglucosaminidase 1 /// N-acetyltransferase 6                                           | 0.43 | 0.0 |
| <i>Igj</i>                   | immunoglobulin joining chain                                                                   | 0.43 | 0.0 |
| <i>Gulp1</i>                 | GULP, engulfment adaptor PTB domain containing 1                                               | 0.43 | 0.0 |
| <i>Adamts20</i>              | a disintegrin-like and metallopeptidase (reprolysin type) with thrombospondin type 1 motif, 20 | 0.43 | 0.0 |
| <i>Rnf135</i>                | ring finger protein 135                                                                        | 0.43 | 0.0 |
| <i>Xiap</i>                  | X-linked inhibitor of apoptosis                                                                | 0.43 | 2.8 |
| <i>Hsph1</i>                 | heat shock 105kDa/110kDa protein 1                                                             | 0.43 | 0.0 |
| <i>Baz1b</i>                 | bromodomain adjacent to zinc finger domain, 1B                                                 | 0.43 | 0.0 |
| <i>Jam2</i>                  | junction adhesion molecule 2                                                                   | 0.43 | 0.0 |
| <i>Invs</i>                  | inversin                                                                                       | 0.43 | 0.0 |
| <i>Plch1</i>                 | phospholipase C, eta 1                                                                         | 0.43 | 0.0 |
| <i>Nuak1</i>                 | NUAK family, SNF1-like kinase, 1                                                               | 0.43 | 0.0 |
| <i>Cthrc1</i>                | collagen triple helix repeat containing 1                                                      | 0.43 | 2.8 |
| <i>Slc25a27</i>              | Solute carrier family 25, member 27                                                            | 0.43 | 0.0 |
| <i>1700029J07Rik</i>         | RIKEN cDNA 1700029J07 gene                                                                     | 0.43 | 0.0 |
| <i>Gm19935</i>               | predicted gene, 19935                                                                          | 0.43 | 0.0 |
| <i>Ephb4</i>                 | Eph receptor B4                                                                                | 0.43 | 0.0 |
| <i>Gm19439</i>               | predicted gene, 19439                                                                          | 0.43 | 0.0 |
| <i>1810063B05Rik</i>         | RIKEN cDNA 1810063B05 gene                                                                     | 0.43 | 0.0 |
| <i>Csnk2a1</i>               | casein kinase 2, alpha 1 polypeptide                                                           | 0.43 | 0.0 |
| <i>Nkd2</i>                  | naked cuticle 2 homolog (Drosophila)                                                           | 0.43 | 0.0 |
| <i>2900092E17Rik</i>         | RIKEN cDNA 2900092E17 gene                                                                     | 0.43 | 0.0 |
| <i>Gga2</i>                  | golgi associated, gamma adaptin ear containing, ARF binding protein 2                          | 0.44 | 0.0 |
| <i>Efhc1</i>                 | EF-hand domain (C-terminal) containing 1                                                       | 0.44 | 0.0 |
| <i>Fbxl20</i>                | F-box and leucine-rich repeat protein 20                                                       | 0.44 | 0.0 |
| <i>Spice1</i>                | spindle and centriole associated protein 1                                                     | 0.44 | 0.0 |
| <i>Scaper</i>                | S phase cyclin A-associated protein in the ER                                                  | 0.44 | 0.0 |
| <i>Atf7ip</i>                | activating transcription factor 7 interacting protein                                          | 0.44 | 0.0 |
| <i>Nudt21</i>                | nudix (nucleoside diphosphate linked moiety X)-type motif 21                                   | 0.44 | 7.8 |
| <i>1110017F19Rik</i>         | RIKEN cDNA 1110017F19 gene                                                                     | 0.44 | 0.0 |
| <i>Tbc1d24</i>               | TBC1 domain family, member 24                                                                  | 0.44 | 0.0 |
| <i>Klc1</i>                  | kinesin light chain 1                                                                          | 0.44 | 0.0 |
| <i>Atf2 /// LOC100047997</i> | activating transcription factor 2 /// cyclic AMP-dependent transcription factor ATF-2-like     | 0.44 | 0.0 |
| <i>Khyn</i>                  | KH and NYN domain containing                                                                   | 0.44 | 0.0 |
| <i>Cep68</i>                 | centrosomal protein 68                                                                         | 0.44 | 0.0 |
| <i>Angpt1</i>                | angiopoietin 1                                                                                 | 0.44 | 0.0 |
| <i>1810012P15Rik</i>         | RIKEN cDNA 1810012P15 gene                                                                     | 0.44 | 0.0 |
| <i>Nudt5</i>                 | nudix (nucleoside diphosphate linked moiety X)-type motif 5                                    | 0.44 | 0.0 |
| <i>Chia</i>                  | chitinase, acidic                                                                              | 0.44 | 0.0 |

|                            |                                                                                   |      |     |
|----------------------------|-----------------------------------------------------------------------------------|------|-----|
| <i>Fam120b</i>             | family with sequence similarity 120, member B                                     | 0.44 | 0.0 |
| <i>Robo2</i>               | roundabout homolog 2 (Drosophila)                                                 | 0.44 | 2.8 |
| <i>Chd9</i>                | chromodomain helicase DNA binding protein 9                                       | 0.44 | 0.0 |
| <i>Zfp248</i>              | zinc finger protein 248                                                           | 0.44 | 2.8 |
| <i>Etv1</i>                | ets variant gene 1                                                                | 0.44 | 0.0 |
| <i>Traf1</i>               | TNF receptor-associated factor 1                                                  | 0.44 | 0.0 |
| <i>Ttc29</i>               | tetratricopeptide repeat domain 29                                                | 0.44 | 0.0 |
| <i>C2cd2</i>               | C2 calcium-dependent domain containing 2                                          | 0.44 | 0.0 |
| <i>2810410L24Rik</i>       | RIKEN cDNA 2810410L24 gene                                                        | 0.44 | 0.0 |
| <i>Flt3l /// Rpl13a</i>    | FMS-like tyrosine kinase 3 ligand /// ribosomal protein L13A                      | 0.44 | 0.0 |
| <i>Ikzf2</i>               | IKAROS family zinc finger 2                                                       | 0.45 | 0.0 |
| <i>1700094D03Rik</i>       | RIKEN cDNA 1700094D03 gene                                                        | 0.45 | 0.0 |
| <i>Sh3d19</i>              | SH3 domain protein D19                                                            | 0.45 | 0.0 |
| <i>Synpo2</i>              | synaptopodin 2                                                                    | 0.45 | 7.8 |
| <i>Hs6st2</i>              | heparan sulfate 6-O-sulfotransferase 2                                            | 0.45 | 0.0 |
| <i>4930420K17Rik</i>       | RIKEN cDNA 4930420K17 gene                                                        | 0.45 | 0.0 |
| <i>Tfcp2</i>               | transcription factor CP2                                                          | 0.45 | 0.0 |
| <i>Ttc9c</i>               | tetratricopeptide repeat domain 9C                                                | 0.45 | 2.8 |
| <i>Gja4</i>                | gap junction protein, alpha 4                                                     | 0.45 | 0.0 |
| <i>Rheb1l</i>              | Ras homolog enriched in brain like 1                                              | 0.45 | 0.0 |
| <i>Plcb3</i>               | phospholipase C, beta 3                                                           | 0.45 | 0.0 |
| <i>Ptgfr</i>               | prostaglandin F receptor                                                          | 0.45 | 0.0 |
| <i>2900046F13Rik</i>       | RIKEN cDNA 2900046F13 gene                                                        | 0.45 | 0.0 |
| <i>Mynn</i>                | myoneurin                                                                         | 0.45 | 0.0 |
| <i>Golph3l</i>             | golgi phosphoprotein 3-like                                                       | 0.45 | 0.0 |
| <i>C920008N22Rik</i>       | RIKEN cDNA C920008N22 gene                                                        | 0.45 | 0.0 |
| <i>Yeats2</i>              | YEATS domain containing 2                                                         | 0.45 | 0.0 |
| <i>Aass</i>                | aminoadipate-semialdehyde synthase                                                | 0.45 | 0.0 |
| <i>Trim34a /// Trim34b</i> | tripartite motif-containing 34A /// tripartite motif-containing 34B               | 0.45 | 0.0 |
| <i>Cenpj</i>               | centromere protein J                                                              | 0.45 | 0.0 |
| <i>Dzip1l</i>              | DAZ interacting protein 1-like                                                    | 0.45 | 0.0 |
| <i>Thap3</i>               | THAP domain containing, apoptosis associated protein 3                            | 0.45 | 0.0 |
| <i>Mdm4</i>                | transformed mouse 3T3 cell double minute 4                                        | 0.45 | 0.0 |
| <i>4933411K20Rik</i>       | RIKEN cDNA 4933411K20 gene                                                        | 0.45 | 0.0 |
| <i>Fert2</i>               | fer (fms/fps related) protein kinase, testis specific 2                           | 0.45 | 0.0 |
| <i>Elmod1</i>              | ELMO domain containing 1                                                          | 0.45 | 0.0 |
| <i>Fam82b</i>              | family with sequence similarity 82, member B                                      | 0.45 | 0.0 |
| <i>Crebzf</i>              | CREB/ATF bZIP transcription factor                                                | 0.45 | 0.0 |
| <i>Lrrc6</i>               | leucine rich repeat containing 6 (testis)                                         | 0.45 | 0.0 |
| <i>2410002O22Rik</i>       | RIKEN cDNA 2410002O22 gene                                                        | 0.45 | 0.0 |
| <i>Sirt5</i>               | sirtuin 5 (silent mating type information regulation 2 homolog) 5 (S. cerevisiae) | 0.45 | 0.0 |
| <i>Ubxn7</i>               | UBX domain protein 7                                                              | 0.46 | 2.8 |
| <i>Akr1c19</i>             | aldo-keto reductase family 1, member C19                                          | 0.46 | 0.0 |
| <i>5031426D15Rik</i>       | RIKEN cDNA 5031426D15 gene                                                        | 0.46 | 0.0 |
| <i>Ints6</i>               | integrator complex subunit 6                                                      | 0.46 | 2.8 |
| <i>E430024I08Rik</i>       | RIKEN cDNA E430024I08 gene                                                        | 0.46 | 0.0 |
| <i>D4Bwg0951e</i>          | DNA segment, Chr 4, Brigham & Women's Genetics 0951                               | 0.46 | 0.0 |

|                              |                                                                                                      |      |     |
|------------------------------|------------------------------------------------------------------------------------------------------|------|-----|
|                              | expressed                                                                                            |      |     |
| <i>Pisd-ps1 /// Pisd-ps3</i> | phosphatidylserine decarboxylase, pseudogene 1 ///<br>phosphatidylserine decarboxylase, pseudogene 3 | 0.46 | 0.0 |
| <i>Zfp14</i>                 | zinc finger protein 14                                                                               | 0.46 | 0.0 |
| <i>Dnahc12</i>               | dynein, axonemal, heavy chain 12                                                                     | 0.46 | 0.0 |
| <i>Pgpep1</i>                | pyroglutamyl-peptidase I                                                                             | 0.46 | 0.0 |
| <i>Ints8</i>                 | integrator complex subunit 8                                                                         | 0.46 | 0.0 |
| <i>Scai</i>                  | suppressor of cancer cell invasion                                                                   | 0.46 | 0.0 |
| <i>Papss2</i>                | 3'-phosphoadenosine 5'-phosphosulfate synthase 2                                                     | 0.46 | 2.8 |
| <i>Slc38a6</i>               | solute carrier family 38, member 6                                                                   | 0.46 | 0.0 |
| <i>Itsn1</i>                 | intersectin 1 (SH3 domain protein 1A)                                                                | 0.46 | 0.0 |
| <i>Zmat1</i>                 | zinc finger, matrin type 1                                                                           | 0.46 | 0.0 |
| <i>Gm10374</i>               | predicted gene 10374                                                                                 | 0.46 | 0.0 |
| <i>Zfp260</i>                | zinc finger protein 260                                                                              | 0.46 | 0.0 |
| <i>Rbm5</i>                  | RNA binding motif protein 5                                                                          | 0.46 | 0.0 |
| <i>Vps33a</i>                | vacuolar protein sorting 33A (yeast)                                                                 | 0.46 | 0.0 |
| <i>Esyt3</i>                 | extended synaptotagmin-like protein 3                                                                | 0.46 | 0.0 |
| <i>1110032A04Rik</i>         | RIKEN cDNA 1110032A04 gene                                                                           | 0.46 | 0.0 |
| <i>Lbh</i>                   | limb-bud and heart                                                                                   | 0.46 | 0.0 |
| <i>9230114K14Rik</i>         | RIKEN cDNA 9230114K14 gene                                                                           | 0.46 | 0.0 |
| <i>Dcun1d2</i>               | DCN1, defective in cullin neddylation 1, domain<br>containing 2 ( <i>S. cerevisiae</i> )             | 0.46 | 2.8 |
| <i>Hey1</i>                  | hairy/enhancer-of-split related with YRPW motif 1                                                    | 0.46 | 0.0 |
| <i>Bcl11a</i>                | B cell CLL/lymphoma 11A (zinc finger protein)                                                        | 0.46 | 7.8 |
| <i>1810011O10Rik</i>         | RIKEN cDNA 1810011O10 gene                                                                           | 0.46 | 0.0 |
| <i>Ptprz1</i>                | protein tyrosine phosphatase, receptor type Z, polypeptide<br>1                                      | 0.46 | 7.8 |
| <i>Tcap</i>                  | titin-cap                                                                                            | 0.46 | 2.8 |
| <i>Rasal2</i>                | RAS protein activator like 2                                                                         | 0.46 | 0.0 |
| <i>2610507I01Rik</i>         | RIKEN cDNA 2610507I01 gene                                                                           | 0.46 | 0.0 |
| <i>Lca5</i>                  | Leber congenital amaurosis 5 (human)                                                                 | 0.46 | 0.0 |
| <i>Chst7</i>                 | carbohydrate (N-acetylglucosamino) sulfotransferase 7                                                | 0.46 | 0.0 |
| <i>Gpt2</i>                  | glutamic pyruvate transaminase (alanine<br>aminotransferase) 2                                       | 0.46 | 2.8 |
| <i>Olfml1</i>                | olfactomedin-like 1                                                                                  | 0.46 | 0.0 |
| <i>Slc6a2</i>                | solute carrier family 6 (neurotransmitter transporter,<br>noradrenalin), member 2                    | 0.46 | 0.0 |
| <i>Rab3ip</i>                | RAB3A interacting protein                                                                            | 0.46 | 0.0 |
| <i>Atic</i>                  | 5-aminoimidazole-4-carboxamide ribonucleotide<br>formyltransferase/IMP cyclohydrolase                | 0.47 | 0.0 |
| <i>Stx3</i>                  | syntaxin 3                                                                                           | 0.47 | 0.0 |
| <i>Tardbp</i>                | TAR DNA binding protein                                                                              | 0.47 | 0.0 |
| <i>Chordc1</i>               | cysteine and histidine-rich domain (CHORD)-containing,<br>zinc-binding protein 1                     | 0.47 | 0.0 |
| <i>Cpeb1</i>                 | cytoplasmic polyadenylation element binding protein 1                                                | 0.47 | 0.0 |
| <i>Dusp18</i>                | dual specificity phosphatase 18                                                                      | 0.47 | 0.0 |
| <i>Ckmt1</i>                 | creatine kinase, mitochondrial 1, ubiquitous                                                         | 0.47 | 2.8 |
| <i>Stat1</i>                 | signal transducer and activator of transcription 1                                                   | 0.47 | 0.0 |
| <i>Sept8</i>                 | septin 8                                                                                             | 0.47 | 0.0 |
| <i>Rph3al</i>                | rabphilin 3A-like (without C2 domains)                                                               | 0.47 | 0.0 |



|                               |                                                                                                                          |      |     |
|-------------------------------|--------------------------------------------------------------------------------------------------------------------------|------|-----|
| <i>6820402A03Rik</i>          | RIKEN cDNA 6820402A03 gene                                                                                               | 0.47 | 0.0 |
| <i>Mtcp1</i>                  | mature T cell proliferation 1                                                                                            | 0.47 | 0.0 |
| <i>Dzip1</i>                  | DAZ interacting protein 1                                                                                                | 0.47 | 0.0 |
| <i>Slc6a15</i>                | solute carrier family 6 (neurotransmitter transporter), member 15                                                        | 0.47 | 0.0 |
| <i>Nqo2</i>                   | NAD(P)H dehydrogenase, quinone 2                                                                                         | 0.47 | 2.8 |
| <i>Caprin1</i>                | cell cycle associated protein 1                                                                                          | 0.47 | 0.0 |
| <i>Dnaja4</i>                 | DnaJ (Hsp40) homolog, subfamily A, member 4                                                                              | 0.47 | 0.0 |
| <i>Nr1h3</i>                  | nuclear receptor subfamily 1, group H, member 3                                                                          | 0.47 | 2.8 |
| <i>Wdr96</i>                  | WD repeat domain 96                                                                                                      | 0.47 | 0.0 |
| <i>Gpd1l</i>                  | glycerol-3-phosphate dehydrogenase 1-like                                                                                | 0.47 | 0.0 |
| <i>Rarb</i>                   | retinoic acid receptor, beta                                                                                             | 0.47 | 0.0 |
| <i>She</i>                    | src homology 2 domain-containing transforming protein E                                                                  | 0.47 | 0.0 |
| <i>Nnt</i>                    | nicotinamide nucleotide transhydrogenase                                                                                 | 0.47 | 0.0 |
| <i>Fgf7</i>                   | fibroblast growth factor 7                                                                                               | 0.47 | 0.0 |
| <i>Grasp</i>                  | GRP1 (general receptor for phosphoinositides 1)-associated scaffold protein                                              | 0.47 | 0.0 |
| <i>Ogt</i>                    | O-linked N-acetylglucosamine (GlcNAc) transferase (UDP-N-acetylglucosamine:polypeptide-N-acetylglucosaminyl transferase) | 0.47 | 0.0 |
| <i>Gm20559</i>                | predicted gene, 20559                                                                                                    | 0.47 | 0.0 |
| <i>Hhip</i>                   | Hedgehog-interacting protein                                                                                             | 0.47 | 0.0 |
| <i>Fam46c</i>                 | family with sequence similarity 46, member C                                                                             | 0.47 | 7.8 |
| <i>Slc4a1</i>                 | solute carrier family 4 (anion exchanger), member 1                                                                      | 0.47 | 0.0 |
| <i>2900072G11Rik</i>          | RIKEN cDNA 2900072G11 gene                                                                                               | 0.47 | 0.0 |
| <i>Csrnp2</i>                 | cysteine-serine-rich nuclear protein 2                                                                                   | 0.47 | 2.8 |
| <i>Gm12942 /// Zmym6</i>      | predicted gene 12942 /// zinc finger, MYM-type 6                                                                         | 0.47 | 0.0 |
| <i>Pank1</i>                  | pantothenate kinase 1                                                                                                    | 0.47 | 0.0 |
| <i>Cdkn2c</i>                 | cyclin-dependent kinase inhibitor 2C (p18, inhibits CDK4)                                                                | 0.47 | 0.0 |
| <i>Osbpl6</i>                 | oxysterol binding protein-like 6                                                                                         | 0.47 | 0.0 |
| <i>Tdp1</i>                   | tyrosyl-DNA phosphodiesterase 1                                                                                          | 0.47 | 0.0 |
| <i>Hoxa5</i>                  | homeobox A5                                                                                                              | 0.47 | 0.0 |
| <i>Dnaja1</i>                 | DnaJ (Hsp40) homolog, subfamily A, member 1                                                                              | 0.47 | 0.0 |
| <i>Ccng2</i>                  | cyclin G2                                                                                                                | 0.47 | 0.0 |
| <i>Inpp5e</i>                 | inositol polyphosphate-5-phosphatase E                                                                                   | 0.47 | 0.0 |
| <i>Ccdc162</i>                | coiled-coil domain containing 162                                                                                        | 0.47 | 0.0 |
| <i>Six4</i>                   | sine oculis-related homeobox 4 homolog (Drosophila)                                                                      | 0.47 | 0.0 |
| <i>Zfp60</i>                  | zinc finger protein 60                                                                                                   | 0.47 | 0.0 |
| <i>Ddo</i>                    | D-aspartate oxidase                                                                                                      | 0.47 | 0.0 |
| <i>Sytl4</i>                  | synaptotagmin-like 4                                                                                                     | 0.47 | 0.0 |
| <i>Gm16136</i>                | predicted gene 16136                                                                                                     | 0.47 | 0.0 |
| <i>Mapk12</i>                 | mitogen-activated protein kinase 12                                                                                      | 0.47 | 0.0 |
| <i>Stmn2</i>                  | stathmin-like 2                                                                                                          | 0.48 | 0.0 |
| <i>Tril</i>                   | TLR4 interactor with leucine-rich repeats                                                                                | 0.48 | 0.0 |
| <i>Prkar2b</i>                | protein kinase, cAMP dependent regulatory, type II beta                                                                  | 0.48 | 0.0 |
| <i>6330403M23Rik /// Pura</i> | RIKEN cDNA 6330403M23 gene /// purine rich element binding protein A                                                     | 0.48 | 0.0 |
| <i>Zfp161</i>                 | zinc finger protein 161                                                                                                  | 0.48 | 0.0 |
| <i>Rnf141</i>                 | ring finger protein 141                                                                                                  | 0.48 | 0.0 |

|                      |                                                                            |      |     |
|----------------------|----------------------------------------------------------------------------|------|-----|
| <i>Samd5</i>         | sterile alpha motif domain containing 5                                    | 0.48 | 2.8 |
| <i>Mlh3</i>          | mutL homolog 3 (E coli)                                                    | 0.48 | 0.0 |
| <i>Mfsd9</i>         | major facilitator superfamily domain containing 9                          | 0.48 | 0.0 |
| <i>Id1</i>           | inhibitor of DNA binding 1                                                 | 0.48 | 0.0 |
| <i>2210018M11Rik</i> | RIKEN cDNA 2210018M11 gene                                                 | 0.48 | 0.0 |
| <i>Casp12</i>        | caspase 12                                                                 | 0.48 | 0.0 |
| <i>Gse1</i>          | genetic suppressor element 1                                               | 0.48 | 0.0 |
| <i>Tmeff1</i>        | transmembrane protein with EGF-like and two follistatin-like domains 1     | 0.48 | 0.0 |
| <i>Lrrn3</i>         | leucine rich repeat protein 3, neuronal                                    | 0.48 | 2.8 |
| <i>Skp2</i>          | S-phase kinase-associated protein 2 (p45)                                  | 0.48 | 7.8 |
| <i>Dzip3</i>         | DAZ interacting protein 3, zinc finger                                     | 0.48 | 0.0 |
| <i>Btbd3</i>         | BTB (POZ) domain containing 3                                              | 0.48 | 0.0 |
| <i>Tjp3</i>          | tight junction protein 3                                                   | 0.48 | 0.0 |
| <i>Bpifa1</i>        | BPI fold containing family A, member 1                                     | 0.48 | 7.8 |
| <i>Rasgrp2</i>       | RAS, guanyl releasing protein 2                                            | 0.48 | 0.0 |
| <i>Pex26</i>         | peroxisomal biogenesis factor 26                                           | 0.48 | 0.0 |
| <i>4930430F08Rik</i> | RIKEN cDNA 4930430F08 gene                                                 | 0.48 | 0.0 |
| <i>Tatdn3</i>        | TatD DNase domain containing 3                                             | 0.48 | 0.0 |
| <i>Dnmt1</i>         | DNA methyltransferase (cytosine-5) 1                                       | 0.48 | 0.0 |
| <i>Mbtps1</i>        | membrane-bound transcription factor peptidase, site 1                      | 0.48 | 7.8 |
| <i>Zscan22</i>       | zinc finger and SCAN domain containing 22                                  | 0.48 | 0.0 |
| <i>Map4k3</i>        | Mitogen-activated protein kinase kinase kinase kinase 3                    | 0.48 | 0.0 |
| <i>Mtrr</i>          | 5-methyltetrahydrofolate-homocysteine methyltransferase reductase          | 0.48 | 0.0 |
| <i>Ssx2ip</i>        | synovial sarcoma, X breakpoint 2 interacting protein                       | 0.48 | 0.0 |
| <i>Cpt1c</i>         | carnitine palmitoyltransferase 1c                                          | 0.48 | 0.0 |
| <i>Ccdc45</i>        | coiled-coil domain containing 45                                           | 0.48 | 0.0 |
| <i>Efcab7</i>        | EF-hand calcium binding domain 7                                           | 0.48 | 0.0 |
| <i>Tecpr2</i>        | tectonin beta-propeller repeat containing 2                                | 0.48 | 0.0 |
| <i>Myo9a</i>         | myosin IXa                                                                 | 0.48 | 0.0 |
| <i>Lsm10</i>         | U7 snRNP-specific Sm-like protein LSM10                                    | 0.48 | 0.0 |
| <i>Tmem116</i>       | transmembrane protein 116                                                  | 0.48 | 7.8 |
| <i>Runx1t1</i>       | runt-related transcription factor 1; translocated to, 1 (cyclin D-related) | 0.48 | 0.0 |
| <i>Aqp4</i>          | aquaporin 4                                                                | 0.48 | 0.0 |
| <i>Rgs3</i>          | regulator of G-protein signaling 3                                         | 0.48 | 0.0 |
| <i>Tex11</i>         | testis expressed gene 11                                                   | 0.48 | 0.0 |
| <i>Gfm2</i>          | G elongation factor, mitochondrial 2                                       | 0.48 | 0.0 |
| <i>Stxbp5</i>        | syntaxin binding protein 5 (tomosyn)                                       | 0.48 | 0.0 |
| <i>Traf3ip1</i>      | TRAF3 interacting protein 1                                                | 0.48 | 0.0 |
| <i>Prps2</i>         | phosphoribosyl pyrophosphate synthetase 2                                  | 0.48 | 2.8 |
| <i>Zfp708</i>        | zinc finger protein 708                                                    | 0.49 | 0.0 |
| <i>2610034B18Rik</i> | RIKEN cDNA 2610034B18 gene                                                 | 0.49 | 0.0 |
| <i>Kit</i>           | kit oncogene                                                               | 0.49 | 0.0 |
| <i>Ankmy2</i>        | ankyrin repeat and MYND domain containing 2                                | 0.49 | 0.0 |
| <i>Ccdc85b</i>       | coiled-coil domain containing 85B                                          | 0.49 | 0.0 |
| <i>Fhdc1</i>         | FH2 domain containing 1                                                    | 0.49 | 0.0 |
| <i>Cpsf6</i>         | cleavage and polyadenylation specific factor 6                             | 0.49 | 0.0 |
| <i>9530067D14Rik</i> | Riken cDNA 9530067D14 gene                                                 | 0.49 | 0.0 |

|                                  |                                                                    |      |     |
|----------------------------------|--------------------------------------------------------------------|------|-----|
| <i>Fam149a</i>                   | family with sequence similarity 149, member A                      | 0.49 | 0.0 |
| <i>1110021J02Rik</i>             | RIKEN cDNA 1110021J02 gene                                         | 0.49 | 0.0 |
| <i>Suv420h2</i>                  | suppressor of variegation 4-20 homolog 2 (Drosophila)              | 0.49 | 0.0 |
| <i>Dguok</i>                     | deoxyguanosine kinase                                              | 0.49 | 0.0 |
| <i>C87436</i>                    | expressed sequence C87436                                          | 0.49 | 0.0 |
| <i>Cbx7</i>                      | chromobox 7                                                        | 0.49 | 0.0 |
| <i>Podxl</i>                     | podocalyxin-like                                                   | 0.49 | 2.8 |
| <i>Acox2</i>                     | acyl-Coenzyme A oxidase 2, branched chain                          | 0.49 | 0.0 |
| <i>Sp1</i>                       | trans-acting transcription factor 1                                | 0.49 | 0.0 |
| <i>Megf6</i>                     | multiple EGF-like-domains 6                                        | 0.49 | 0.0 |
| <i>2900056M20Rik</i>             | RIKEN cDNA 2900056M20 gene                                         | 0.49 | 0.0 |
| <i>Rsph10b2</i>                  | radial spoke head 10 homolog B (Chlamydomonas)                     | 0.49 | 0.0 |
| <i>9530010C24Rik</i>             | RIKEN cDNA 9530010C24 gene                                         | 0.49 | 0.0 |
| <i>9330151L19Rik</i>             | RIKEN cDNA 9330151L19 gene                                         | 0.49 | 0.0 |
| <i>Tmcc2</i>                     | transmembrane and coiled-coil domains 2                            | 0.49 | 0.0 |
| <i>Tef</i>                       | thyrotroph embryonic factor                                        | 0.49 | 0.0 |
| <i>Rad1</i>                      | RAD1 homolog (S. pombe)                                            | 0.49 | 2.8 |
| <i>Dnaja3</i>                    | DnaJ (Hsp40) homolog, subfamily A, member 3                        | 0.49 | 0.0 |
| <i>Ttc30a1</i>                   | tetratricopeptide repeat domain 30A1                               | 0.49 | 0.0 |
| <i>Sspn</i>                      | sarcospan                                                          | 0.49 | 0.0 |
| <i>6330503K22Rik</i>             | RIKEN cDNA 6330503K22 gene                                         | 0.49 | 0.0 |
| <i>Tmem129</i>                   | transmembrane protein 129                                          | 0.49 | 0.0 |
| <i>Chd6</i>                      | chromodomain helicase DNA binding protein 6                        | 0.49 | 0.0 |
| <i>Btrc</i>                      | beta-transducin repeat containing protein                          | 0.49 | 0.0 |
| <i>Asxl2</i>                     | additional sex combs like 2 (Drosophila)                           | 0.49 | 0.0 |
| <i>Irgm2</i>                     | immunity-related GTPase family M member 2                          | 0.49 | 0.0 |
| <i>Rgl3</i>                      | ral guanine nucleotide dissociation stimulator-like 3              | 0.49 | 0.0 |
| <i>Mthfr</i>                     | 5,10-methylenetetrahydrofolate reductase                           | 0.49 | 0.0 |
| <i>Mr1</i>                       | major histocompatibility complex, class I-related                  | 0.49 | 0.0 |
| <i>Traf5</i>                     | TNF receptor-associated factor 5                                   | 0.49 | 0.0 |
| <i>6720401G13Rik</i>             | RIKEN cDNA 6720401G13 gene                                         | 0.49 | 0.0 |
| <i>Wwc2</i>                      | WW, C2 and coiled-coil domain containing 2                         | 0.49 | 7.8 |
| <i>Zfp658</i>                    | zinc finger protein 658                                            | 0.50 | 7.8 |
| <i>Actb</i>                      | actin, beta                                                        | 0.50 | 0.0 |
| <i>Hist1h4a /// Hist1h4b ///</i> | histone cluster 1, H4a /// histone cluster 1, H4b /// histone      | 0.50 | 2.8 |
| <i>Hist1h4c /// Hist1h4d ///</i> | cluster 1, H4c /// histone cluster 1, H4d /// histone cluster      |      |     |
| <i>Hist1h4f /// Hist1h4h ///</i> | 1, H4f /// histone cluster 1, H4h /// histone cluster 1, H4i       |      |     |
| <i>Hist1h4i /// Hist1h4j ///</i> | /// histone cluster 1, H4j /// histone cluster 1, H4k ///          |      |     |
| <i>Hist1h4k /// Hist1h4m ///</i> | histone cluster 1, H4m /// histone cluster 1, H4n /// histone      |      |     |
| <i>Hist1h4n /// Hist2h4 ///</i>  | cluster 2, H4 /// histone cluster 4, H4 /// histone H4-like        |      |     |
| <i>Hist4h4 ///</i>               |                                                                    |      |     |
| <i>LOC100862646</i>              |                                                                    |      |     |
| <i>Plekha6</i>                   | pleckstrin homology domain containing, family A member 6           | 0.50 | 0.0 |
| <i>Trpc2</i>                     | transient receptor potential cation channel, subfamily C, member 2 | 0.50 | 0.0 |
| <i>Fam13c</i>                    | family with sequence similarity 13, member C                       | 0.50 | 0.0 |
| <i>Prkd2</i>                     | protein kinase D2                                                  | 0.50 | 0.0 |
| <i>Mtmt7</i>                     | myotubularin related protein 7                                     | 0.50 | 2.8 |
| <i>Sult1d1</i>                   | sulfotransferase family 1D, member 1                               | 0.50 | 2.8 |

|                              |                                                                                                               |      |     |
|------------------------------|---------------------------------------------------------------------------------------------------------------|------|-----|
| <i>2810416A17Rik</i>         | RIKEN cDNA 2810416A17 gene                                                                                    | 0.50 | 2.8 |
| <i>Hyal2</i>                 | hyaluronoglucosaminidase 2                                                                                    | 0.50 | 0.0 |
| <i>Actc1</i>                 | actin, alpha, cardiac muscle 1                                                                                | 0.50 | 2.8 |
| <i>Mtap4</i>                 | Microtubule-associated protein 4                                                                              | 0.50 | 7.8 |
| <i>Tcf19</i>                 | transcription factor 19                                                                                       | 0.50 | 0.0 |
| <i>Banp</i>                  | BTG3 associated nuclear protein                                                                               | 0.50 | 0.0 |
| <i>Pcmt2</i>                 | protein-L-isoaspartate (D-aspartate) O-methyltransferase domain containing 2                                  | 0.50 | 0.0 |
| <i>Odf3b</i>                 | outer dense fiber of sperm tails 3B                                                                           | 0.50 | 0.0 |
| <i>Abhd14b</i>               | abhydrolase domain containing 14b                                                                             | 0.50 | 0.0 |
| <i>1700007K13Rik</i>         | RIKEN cDNA 1700007K13 gene                                                                                    | 0.50 | 0.0 |
| <i>Mmab</i>                  | methylmalonic aciduria (cobalamin deficiency) type B homolog (human)                                          | 0.50 | 0.0 |
| <i>Hes6</i>                  | hairy and enhancer of split 6 (Drosophila)                                                                    | 0.50 | 0.0 |
| <i>Snx21</i>                 | sorting nexin family member 21                                                                                | 0.50 | 0.0 |
| <i>Nthl1</i>                 | nth (endonuclease III)-like 1 (E.coli)                                                                        | 0.50 | 2.8 |
| <i>Pds5b</i>                 | PDS5, regulator of cohesion maintenance, homolog B (S. cerevisiae)                                            | 0.50 | 0.0 |
| <i>Ptgr2</i>                 | prostaglandin reductase 2                                                                                     | 0.50 | 0.0 |
| <i>Eif4e2</i>                | eukaryotic translation initiation factor 4E member 2                                                          | 2.00 | 0.0 |
| <i>Wac</i>                   | WW domain containing adaptor with coiled-coil                                                                 | 2.00 | 0.0 |
| <i>8030448K23Rik</i>         | RIKEN cDNA 8030448K23 gene                                                                                    | 2.00 | 0.0 |
| <i>Kcnk1</i>                 | potassium channel, subfamily K, member 1                                                                      | 2.00 | 0.0 |
| <i>2010002N04Rik</i>         | RIKEN cDNA 2010002N04 gene                                                                                    | 2.00 | 0.0 |
| <i>Plxna2</i>                | plexin A2                                                                                                     | 2.00 | 0.0 |
| <i>Rps20</i>                 | ribosomal protein S20                                                                                         | 2.00 | 0.0 |
| <i>LOC269472</i>             | uncharacterized LOC269472                                                                                     | 2.00 | 0.0 |
| <i>AU021128</i>              | expressed sequence AU021128                                                                                   | 2.01 | 5.2 |
| <i>Usp53</i>                 | ubiquitin specific peptidase 53                                                                               | 2.01 | 5.2 |
| <i>Plscr1</i>                | phospholipid scramblase 1                                                                                     | 2.01 | 0.0 |
| <i>St6galnac4</i>            | ST6 (alpha-N-acetyl-neuraminyl-2,3-beta-galactosyl-1,3)-N-acetylgalactosaminide alpha-2,6-sialyltransferase 4 | 2.01 | 0.0 |
| <i>Ndrp1</i>                 | N-myc downstream regulated gene 1                                                                             | 2.01 | 0.0 |
| <i>Dusp16</i>                | dual specificity phosphatase 16                                                                               | 2.01 | 0.0 |
| <i>Edn2</i>                  | endothelin 2                                                                                                  | 2.01 | 0.0 |
| <i>Pim1</i>                  | proviral integration site 1                                                                                   | 2.01 | 0.0 |
| <i>Map2k3</i>                | mitogen-activated protein kinase kinase 3                                                                     | 2.01 | 0.0 |
| <i>Cdk13</i>                 | cyclin-dependent kinase 13                                                                                    | 2.01 | 0.0 |
| <i>Gm5620 /// Gm6682 ///</i> | predicted gene 5620 /// tubulin, alpha 1C pseudogene ///                                                      | 2.01 | 0.0 |
| <i>LOC100862648 ///</i>      | tubulin alpha-1C chain-like ///                                                                               |      |     |
| <i>Tuba1a /// Tuba1b ///</i> | tubulin, alpha 1B ///                                                                                         |      |     |
| <i>Tuba1c</i>                | tubulin, alpha 1C                                                                                             |      |     |
| <i>Padi4</i>                 | peptidyl arginine deiminase, type IV                                                                          | 2.02 | 0.0 |
| <i>Nipal1</i>                | NIPA-like domain containing 1                                                                                 | 2.02 | 5.2 |
| <i>Fam188a</i>               | family with sequence similarity 188, member A                                                                 | 2.02 | 0.0 |
| <i>Klhl15</i>                | kelch-like 15 (Drosophila)                                                                                    | 2.02 | 0.0 |
| <i>Gcnt2</i>                 | glucosaminyl (N-acetyl) transferase 2, I-branching enzyme                                                     | 2.02 | 0.0 |
| <i>Sesn1</i>                 | sestrin 1                                                                                                     | 2.02 | 0.0 |
| <i>2310058N22Rik</i>         | RIKEN cDNA 2310058N22 gene                                                                                    | 2.02 | 0.0 |

|                         |                                                                     |      |     |
|-------------------------|---------------------------------------------------------------------|------|-----|
| <i>Mboat1</i>           | membrane bound O-acyltransferase domain containing 1                | 2.03 | 0.0 |
| <i>Nop58</i>            | NOP58 ribonucleoprotein homolog (yeast)                             | 2.03 | 0.0 |
| <i>Ept1</i>             | ethanolaminephosphotransferase 1 (CDP-ethanolamine-specific)        | 2.03 | 5.2 |
| <i>Rpf1</i>             | ribosome production factor 1 homolog (S. cerevisiae)                | 2.03 | 0.0 |
| <i>Cd84</i>             | CD84 antigen                                                        | 2.03 | 0.0 |
| <i>2510009E07Rik</i>    | RIKEN cDNA 2510009E07 gene                                          | 2.04 | 0.0 |
| <i>1810032O08Rik</i>    | RIKEN cDNA 1810032O08 gene                                          | 2.04 | 0.0 |
| <i>Sco1</i>             | SCO cytochrome oxidase deficient homolog 1 (yeast)                  | 2.04 | 0.0 |
| <i>Zwint</i>            | ZW10 interactor                                                     | 2.04 | 0.0 |
| <i>Rpap2</i>            | RNA polymerase II associated protein 2                              | 2.05 | 0.0 |
| <i>Brd7</i>             | bromodomain containing 7                                            | 2.05 | 0.0 |
| <i>Rbl1</i>             | retinoblastoma-like 1 (p107)                                        | 2.05 | 0.0 |
| <i>Abcc4</i>            | ATP-binding cassette, sub-family C (CFTR/MRP), member 4             | 2.05 | 0.0 |
| <i>LOC100862515 ///</i> | TBC1 domain family member 1-like ///                                | 2.05 | 0.0 |
| <i>Tbc1d1</i>           | family, member 1                                                    |      |     |
| <i>Pappa</i>            | pregnancy-associated plasma protein A                               | 2.06 | 0.0 |
| <i>D3Erd740e</i>        | DNA segment, Chr 3, ERATO Doi 740, expressed                        | 2.06 | 0.0 |
| <i>Tlr4</i>             | toll-like receptor 4                                                | 2.06 | 0.0 |
| <i>8430408G22Rik</i>    | RIKEN cDNA 8430408G22 gene                                          | 2.06 | 0.0 |
| <i>Pabpc1l</i>          | poly(A) binding protein, cytoplasmic 1-like                         | 2.06 | 0.0 |
| <i>Rai14</i>            | Retinoic acid induced 14                                            | 2.06 | 0.0 |
| <i>Tnfaip3</i>          | tumor necrosis factor, alpha-induced protein 3                      | 2.07 | 0.0 |
| <i>Tmem120a</i>         | transmembrane protein 120A                                          | 2.07 | 0.0 |
| <i>Fhl2</i>             | four and a half LIM domains 2                                       | 2.07 | 0.0 |
| <i>Copa</i>             | coatamer protein complex subunit alpha                              | 2.07 | 0.0 |
| <i>Rhoc</i>             | ras homolog gene family, member C                                   | 2.07 | 0.0 |
| <i>1700071A11Rik</i>    | RIKEN cDNA 1700071A11 gene                                          | 2.07 | 0.0 |
| <i>Ctse</i>             | cathepsin E                                                         | 2.07 | 5.2 |
| <i>Slc9a8</i>           | solute carrier family 9 (sodium/hydrogen exchanger), member 8       | 2.07 | 0.0 |
| <i>Pip5k1b</i>          | phosphatidylinositol-4-phosphate 5-kinase, type 1 beta              | 2.07 | 0.0 |
| <i>Ammecr1l</i>         | AMME chromosomal region gene 1-like                                 | 2.08 | 5.2 |
| <i>St3gal1</i>          | ST3 beta-galactoside alpha-2,3-sialyltransferase 1                  | 2.08 | 0.0 |
| <i>Tm4sf1</i>           | transmembrane 4 superfamily member 1                                | 2.08 | 0.0 |
| <i>Cdkn2b</i>           | cyclin-dependent kinase inhibitor 2B (p15, inhibits CDK4)           | 2.08 | 0.0 |
| <i>Pxmp3</i>            | Peroxisomal membrane protein 3                                      | 2.08 | 0.0 |
| <i>Cul2</i>             | cullin 2                                                            | 2.09 | 0.0 |
| <i>Rbm39</i>            | RNA binding motif protein 39                                        | 2.09 | 0.0 |
| <i>Clptm1</i>           | cleft lip and palate associated transmembrane protein 1             | 2.09 | 0.0 |
| <i>Clip4</i>            | CAP-GLY domain containing linker protein family, member 4           | 2.09 | 5.2 |
| <i>Slc2a1</i>           | solute carrier family 2 (facilitated glucose transporter), member 1 | 2.10 | 0.0 |
| <i>Enc1</i>             | ectodermal-neural cortex 1                                          | 2.10 | 0.0 |
| <i>9430016H08Rik</i>    | RIKEN cDNA 9430016H08 gene                                          | 2.10 | 0.0 |
| <i>Orc4</i>             | origin recognition complex, subunit 4                               | 2.10 | 0.0 |
| <i>Pik3r5</i>           | phosphoinositide-3-kinase, regulatory subunit 5, p101               | 2.10 | 0.0 |

|                                       |                                                                                               |      |     |
|---------------------------------------|-----------------------------------------------------------------------------------------------|------|-----|
| <i>Cdc42</i>                          | cell division cycle 42                                                                        | 2.10 | 0.0 |
| <i>B930098A02Rik</i> /// <i>Chic2</i> | RIKEN cDNA B930098A02 gene /// cysteine-rich hydrophobic domain 2                             | 2.11 | 0.0 |
| <i>Them5</i>                          | thioesterase superfamily member 5                                                             | 2.11 | 0.0 |
| <i>Zfp800</i>                         | zinc finger protein 800                                                                       | 2.11 | 0.0 |
| <i>Itgam</i>                          | integrin alpha M                                                                              | 2.12 | 5.2 |
| <i>Nus1</i>                           | nuclear undecaprenyl pyrophosphate synthase 1 homolog (S. cerevisiae)                         | 2.12 | 0.0 |
| <i>AU014973</i>                       | expressed sequence AU014973                                                                   | 2.12 | 0.0 |
| <i>Fstl3</i>                          | follistatin-like 3                                                                            | 2.12 | 0.0 |
| <i>Ptprk</i>                          | protein tyrosine phosphatase, receptor type, K                                                | 2.13 | 0.0 |
| <i>Wdr61</i>                          | WD repeat domain 61                                                                           | 2.13 | 0.0 |
| <i>Star</i>                           | steroidogenic acute regulatory protein                                                        | 2.13 | 0.0 |
| <i>Malt1</i>                          | mucosa associated lymphoid tissue lymphoma translocation gene 1                               | 2.14 | 0.0 |
| <i>Cdk9</i>                           | cyclin-dependent kinase 9 (CDC2-related kinase)                                               | 2.14 | 0.0 |
| <i>Lmnb1</i>                          | lamin B1                                                                                      | 2.14 | 0.0 |
| <i>Grwd1</i>                          | glutamate-rich WD repeat containing 1                                                         | 2.14 | 0.0 |
| <i>E030047P09Rik</i>                  | RIKEN cDNA E030047P09 gene                                                                    | 2.14 | 0.0 |
| <i>9830001H06Rik</i>                  | RIKEN cDNA 9830001H06 gene                                                                    | 2.14 | 5.2 |
| <i>Tgm1</i>                           | transglutaminase 1, K polypeptide                                                             | 2.14 | 0.0 |
| <i>Myh9</i>                           | myosin, heavy polypeptide 9, non-muscle                                                       | 2.15 | 0.0 |
| <i>Sla</i>                            | src-like adaptor                                                                              | 2.15 | 0.0 |
| <i>4833412E19Rik</i>                  | RIKEN cDNA 4833412E19 gene                                                                    | 2.15 | 0.0 |
| <i>LOC100044742</i> ///               | protein tyrosine phosphatase type IVA 1-like /// protein tyrosine phosphatase 4a1             | 2.15 | 0.0 |
| <i>Ptp4a1</i>                         | tyrosine phosphatase 4a1                                                                      | 2.15 | 0.0 |
| <i>Adamts1</i>                        | a disintegrin-like and metallopeptidase (reprolysin type) with thrombospondin type 1 motif, 1 | 2.15 | 0.0 |
| <i>March3</i>                         | membrane-associated ring finger (C3HC4) 3                                                     | 2.15 | 0.0 |
| <i>Bmp2k</i>                          | BMP2 inducible kinase                                                                         | 2.15 | 0.0 |
| <i>Adarb1</i>                         | adenosine deaminase, RNA-specific, B1                                                         | 2.16 | 0.0 |
| <i>Pmepa1</i>                         | prostate transmembrane protein, androgen induced 1                                            | 2.16 | 0.0 |
| <i>Mex3c</i>                          | mex3 homolog C (C. elegans)                                                                   | 2.16 | 0.0 |
| <i>Klrb1b</i>                         | killer cell lectin-like receptor subfamily B member 1B                                        | 2.16 | 0.0 |
| <i>Sdc4</i>                           | syndecan 4                                                                                    | 2.16 | 0.0 |
| <i>Phf3</i>                           | PHD finger protein 3                                                                          | 2.17 | 0.0 |
| <i>Csf2rb2</i>                        | colony stimulating factor 2 receptor, beta 2, low-affinity (granulocyte-macrophage)           | 2.17 | 0.0 |
| <i>D10Erd709e</i>                     | DNA segment, Chr 10, ERATO Doi 709, expressed                                                 | 2.18 | 0.0 |
| <i>Gas5</i> /// <i>Snord47</i>        | growth arrest specific 5 /// small nucleolar RNA, C/D box 47                                  | 2.18 | 0.0 |
| <i>Cxcr7</i>                          | chemokine (C-X-C motif) receptor 7                                                            | 2.18 | 0.0 |
| <i>Mpzl3</i>                          | myelin protein zero-like 3                                                                    | 2.18 | 0.0 |
| <i>Rps17</i>                          | ribosomal protein S17                                                                         | 2.18 | 0.0 |
| <i>Adamts2</i>                        | ADAMTS-like 2                                                                                 | 2.18 | 0.0 |
| <i>Zfp259</i>                         | zinc finger protein 259                                                                       | 2.18 | 0.0 |
| <i>Camk2d</i>                         | calcium/calmodulin-dependent protein kinase II, delta                                         | 2.19 | 0.0 |
| <i>Snx18</i>                          | sorting nexin 18                                                                              | 2.20 | 0.0 |
| <i>Esd</i> /// <i>Gm2904</i>          | esterase D/formylglutathione hydrolase /// predicted pseudogene 2904                          | 2.20 | 0.0 |

|                      |                                                                                |      |     |
|----------------------|--------------------------------------------------------------------------------|------|-----|
| <i>Itga5</i>         | integrin alpha 5 (fibronectin receptor alpha)                                  | 2.20 | 0.0 |
| <i>Dfna5</i>         | deafness, autosomal dominant 5 (human)                                         | 2.20 | 0.0 |
| <i>1700012B15Rik</i> | RIKEN cDNA 1700012B15 gene                                                     | 2.20 | 0.0 |
| <i>Trim16</i>        | tripartite motif-containing 16                                                 | 2.20 | 0.0 |
| <i>Map2k7</i>        | mitogen-activated protein kinase kinase 7                                      | 2.21 | 5.2 |
| <i>5830407E08Rik</i> | RIKEN cDNA 5830407E08 gene                                                     | 2.21 | 0.0 |
| <i>Fosl2</i>         | fos-like antigen 2                                                             | 2.22 | 0.0 |
| <i>Kdelr3</i>        | KDEL (Lys-Asp-Glu-Leu) endoplasmic reticulum protein retention receptor 3      | 2.23 | 0.0 |
| <i>Camk2n2</i>       | calcium/calmodulin-dependent protein kinase II inhibitor 2                     | 2.23 | 0.0 |
| <i>Dot1l</i>         | DOT1-like, histone H3 methyltransferase ( <i>S. cerevisiae</i> )               | 2.23 | 0.0 |
| <i>Tpcn2</i>         | two pore segment channel 2                                                     | 2.23 | 0.0 |
| <i>Nes</i>           | nestin                                                                         | 2.23 | 0.0 |
| <i>F2rl1</i>         | coagulation factor II (thrombin) receptor-like 1                               | 2.23 | 0.0 |
| <i>Mbp</i>           | myelin basic protein                                                           | 2.23 | 0.0 |
| <i>5830416P10Rik</i> | RIKEN cDNA 5830416P10 gene                                                     | 2.23 | 0.0 |
| <i>Ln timer</i>      | ligand of numb-protein X 2                                                     | 2.24 | 0.0 |
| <i>Dusp8</i>         | dual specificity phosphatase 8                                                 | 2.24 | 0.0 |
| <i>Ipcefl</i>        | interaction protein for cytohesin exchange factors 1                           | 2.24 | 0.0 |
| <i>Slc7a1</i>        | solute carrier family 7 (cationic amino acid transporter, y+ system), member 1 | 2.24 | 0.0 |
| <i>Gn timer</i>      | glucosamine-phosphate N-acetyltransferase 1                                    | 2.25 | 0.0 |
| <i>5430434G16Rik</i> | RIKEN cDNA 5430434G16 gene                                                     | 2.25 | 0.0 |
| <i>Tn timer</i>      | tumor necrosis factor receptor superfamily, member 22                          | 2.25 | 0.0 |
| <i>Tn timer</i>      | tumor necrosis factor receptor superfamily, member 23                          | 2.25 | 0.0 |
| <i>Fam122a</i>       | family with sequence similarity 122, member A                                  | 2.25 | 0.0 |
| <i>Lox1l</i>         | lysyl oxidase-like 1                                                           | 2.25 | 0.0 |
| <i>2900046L07Rik</i> | RIKEN cDNA 2900046L07 gene                                                     | 2.25 | 5.2 |
| <i>4833441D16Rik</i> | RIKEN cDNA 4833441D16 gene                                                     | 2.25 | 0.0 |
| <i>Lass3</i>         | LAG1 homolog, ceramide synthase 3                                              | 2.26 | 0.0 |
| <i>Cidea</i>         | cell death-inducing DNA fragmentation factor, alpha subunit-like effector A    | 2.26 | 0.0 |
| <i>Epha2</i>         | Eph receptor A2                                                                | 2.27 | 0.0 |
| <i>Artn</i>          | artemin                                                                        | 2.27 | 0.0 |
| <i>Uck2</i>          | uridine-cytidine kinase 2                                                      | 2.27 | 0.0 |
| <i>Il17ra</i>        | interleukin 17 receptor A                                                      | 2.29 | 0.0 |
| <i>Sowahb</i>        | sosondowah ankyrin repeat domain family member B                               | 2.29 | 0.0 |
| <i>Sh3bp2</i>        | SH3-domain binding protein 2                                                   | 2.29 | 0.0 |
| <i>Alyref</i>        | Aly/REF export factor                                                          | 2.29 | 0.0 |
| <i>Tes</i>           | testis derived transcript                                                      | 2.29 | 0.0 |
| <i>Nuak2</i>         | NUAK family, SNF1-like kinase, 2                                               | 2.29 | 0.0 |
| <i>Slc25a25</i>      | solute carrier family 25 (mitochondrial carrier, phosphate carrier), member 25 | 2.29 | 0.0 |
| <i>AU019559</i>      | expressed sequence AU019559                                                    | 2.30 | 0.0 |
| <i>Afp</i>           | alpha fetoprotein                                                              | 2.30 | 0.0 |
| <i>C1d</i>           | C1D nuclear receptor co-repressor                                              | 2.30 | 0.0 |
| <i>Ugcg</i>          | UDP-glucose ceramide glucosyltransferase                                       | 2.31 | 0.0 |
| <i>Trim24</i>        | tripartite motif-containing 24                                                 | 2.31 | 5.2 |
| <i>Eif2ak1</i>       | eukaryotic translation initiation factor 2 alpha kinase 1                      | 2.31 | 0.0 |

|                      |                                                                                                                  |      |     |
|----------------------|------------------------------------------------------------------------------------------------------------------|------|-----|
| <i>Lrrc8c</i>        | leucine rich repeat containing 8 family, member C                                                                | 2.31 | 0.0 |
| <i>B230303O12Rik</i> | RIKEN cDNA B230303O12 gene                                                                                       | 2.31 | 0.0 |
| <i>Tubb2b</i>        | tubulin, beta 2B class IIB                                                                                       | 2.32 | 0.0 |
| <i>Ptger4</i>        | prostaglandin E receptor 4 (subtype EP4)                                                                         | 2.32 | 0.0 |
| <i>6720477C19Rik</i> | RIKEN cDNA 6720477C19 gene                                                                                       | 2.32 | 0.0 |
| <i>Ppargc1a</i>      | peroxisome proliferative activated receptor, gamma, coactivator 1 alpha                                          | 2.33 | 0.0 |
| <i>Gimap6</i>        | GTPase, IMAP family member 6                                                                                     | 2.33 | 0.0 |
| <i>Adipor1</i>       | adiponectin receptor 1                                                                                           | 2.33 | 0.0 |
| <i>Gda</i>           | guanine deaminase                                                                                                | 2.34 | 0.0 |
| <i>Zc3hav1</i>       | zinc finger CCCH type, antiviral 1                                                                               | 2.34 | 0.0 |
| <i>Trp53inp2</i>     | Transformation related protein 53 inducible nuclear protein 2                                                    | 2.34 | 0.0 |
| <i>Sdad1</i>         | SDA1 domain containing 1                                                                                         | 2.35 | 0.0 |
| <i>Tmcc3</i>         | transmembrane and coiled coil domains 3                                                                          | 2.35 | 0.0 |
| <i>Prrc1</i>         | proline-rich coiled-coil 1                                                                                       | 2.36 | 0.0 |
| <i>Ms4a6b</i>        | membrane-spanning 4-domains, subfamily A, member 6B                                                              | 2.36 | 0.0 |
| <i>Picalm</i>        | phosphatidylinositol binding clathrin assembly protein                                                           | 2.36 | 0.0 |
| <i>Csf2rb</i>        | colony stimulating factor 2 receptor, beta, low-affinity (granulocyte-macrophage)                                | 2.36 | 0.0 |
| <i>Dnajb5</i>        | DnaJ (Hsp40) homolog, subfamily B, member 5                                                                      | 2.36 | 0.0 |
| <i>Samsn1</i>        | SAM domain, SH3 domain and nuclear localization signals, 1                                                       | 2.36 | 5.2 |
| <i>Prosapip1</i>     | ProSAPiP1 protein                                                                                                | 2.36 | 0.0 |
| <i>C80120</i>        | expressed sequence C80120                                                                                        | 2.37 | 0.0 |
| <i>Mbd1</i>          | methyl-CpG binding domain protein 1                                                                              | 2.37 | 0.0 |
| <i>A330106F07Rik</i> | RIKEN cDNA A330106F07 gene                                                                                       | 2.37 | 5.2 |
| <i>Irs2</i>          | insulin receptor substrate 2                                                                                     | 2.37 | 0.0 |
| <i>Gpr65</i>         | G-protein coupled receptor 65                                                                                    | 2.37 | 0.0 |
| <i>Col5a1</i>        | collagen, type V, alpha 1                                                                                        | 2.38 | 0.0 |
| <i>Srsf7</i>         | serine/arginine-rich splicing factor 7                                                                           | 2.39 | 0.0 |
| <i>E030010A14Rik</i> | RIKEN cDNA E030010A14 gene                                                                                       | 2.39 | 0.0 |
| <i>Shb</i>           | src homology 2 domain-containing transforming protein B                                                          | 2.39 | 0.0 |
| <i>B230216G23Rik</i> | RIKEN cDNA B230216G23 gene                                                                                       | 2.39 | 0.0 |
| <i>Ttc9</i>          | tetratricopeptide repeat domain 9                                                                                | 2.39 | 0.0 |
| <i>Srf</i>           | serum response factor                                                                                            | 2.39 | 0.0 |
| <i>Zfml</i>          | Zinc finger, matrin-like                                                                                         | 2.39 | 0.0 |
| <i>Prg4</i>          | proteoglycan 4 (megakaryocyte stimulating factor, articular superficial zone protein)                            | 2.39 | 0.0 |
| <i>Hbegf</i>         | heparin-binding EGF-like growth factor                                                                           | 2.40 | 0.0 |
| <i>Smox</i>          | spermine oxidase                                                                                                 | 2.40 | 0.0 |
| <i>Rps9</i>          | ribosomal protein S9                                                                                             | 2.40 | 0.0 |
| <i>Mpp6</i>          | membrane protein, palmitoylated 6 (MAGUK p55 subfamily member 6)                                                 | 2.40 | 0.0 |
| <i>Sema4c</i>        | sema domain, immunoglobulin domain (Ig), transmembrane domain (TM) and short cytoplasmic domain, (semaphorin) 4C | 2.41 | 0.0 |
| <i>Egr2</i>          | early growth response 2                                                                                          | 2.41 | 0.0 |
| <i>Daam2</i>         | dishevelled associated activator of morphogenesis 2                                                              | 2.41 | 0.0 |
| <i>Smpd4</i>         | sphingomyelin phosphodiesterase 4                                                                                | 2.41 | 0.0 |



|                              |                                                                                  |      |     |
|------------------------------|----------------------------------------------------------------------------------|------|-----|
| <i>Noc2l</i>                 | nucleolar complex associated 2 homolog ( <i>S. cerevisiae</i> )                  | 2.41 | 0.0 |
| <i>Spsb1</i>                 | splA/ryanodine receptor domain and SOCS box containing 1                         | 2.41 | 5.2 |
| <i>Vcan</i>                  | versican                                                                         | 2.43 | 0.0 |
| <i>Upp1</i>                  | uridine phosphorylase 1                                                          | 2.43 | 5.2 |
| <i>Tmem108</i>               | transmembrane protein 108                                                        | 2.44 | 0.0 |
| <i>Heyl</i>                  | hairy/enhancer-of-split related with YRPW motif-like                             | 2.44 | 0.0 |
| <i>Tacc3</i>                 | transforming, acidic coiled-coil containing protein 3                            | 2.44 | 0.0 |
| <i>Clec4n</i>                | C-type lectin domain family 4, member n                                          | 2.45 | 0.0 |
| <i>1700017B05Rik</i>         | RIKEN cDNA 1700017B05 gene                                                       | 2.45 | 0.0 |
| <i>Itpkc</i>                 | inositol 1,4,5-trisphosphate 3-kinase C                                          | 2.45 | 0.0 |
| <i>Itgb6</i>                 | integrin beta 6                                                                  | 2.45 | 0.0 |
| <i>Dbn1</i>                  | drebrin 1                                                                        | 2.46 | 0.0 |
| <i>Col3a1</i>                | collagen, type III, alpha 1                                                      | 2.46 | 0.0 |
| <i>Syncrip</i>               | synaptotagmin binding, cytoplasmic RNA interacting protein                       | 2.46 | 0.0 |
| <i>Mapk6</i>                 | mitogen-activated protein kinase 6                                               | 2.46 | 0.0 |
| <i>Zkscan5</i>               | zinc finger with KRAB and SCAN domains 5                                         | 2.46 | 0.0 |
| <i>Prmt8</i>                 | protein arginine N-methyltransferase 8                                           | 2.47 | 0.0 |
| <i>Arl4c</i>                 | ADP-ribosylation factor-like 4C                                                  | 2.47 | 0.0 |
| <i>Rnd3</i>                  | Rho family GTPase 3                                                              | 2.48 | 0.0 |
| <i>Sorbs1</i>                | sorbin and SH3 domain containing 1                                               | 2.48 | 0.0 |
| <i>Timp1</i>                 | tissue inhibitor of metalloproteinase 1                                          | 2.48 | 0.0 |
| <i>Kcnk5</i>                 | potassium channel, subfamily K, member 5                                         | 2.49 | 0.0 |
| <i>Plat</i>                  | plasminogen activator, tissue                                                    | 2.49 | 0.0 |
| <i>Nid1</i>                  | nidogen 1                                                                        | 2.49 | 0.0 |
| <i>F3</i>                    | coagulation factor III                                                           | 2.50 | 0.0 |
| <i>Pla2g7</i>                | phospholipase A2, group VII (platelet-activating factor acetylhydrolase, plasma) | 2.50 | 0.0 |
| <i>Neurl3</i>                | neuralized homolog 3 homolog ( <i>Drosophila</i> )                               | 2.50 | 0.0 |
| <i>Fam176a</i>               | family with sequence similarity 176, member A                                    | 2.50 | 0.0 |
| <i>March1</i>                | membrane-associated ring finger (C3HC4) 1                                        | 2.50 | 0.0 |
| <i>Rasl11b</i>               | RAS-like, family 11, member B                                                    | 2.51 | 0.0 |
| <i>AI607873</i>              | expressed sequence AI607873                                                      | 2.51 | 0.0 |
| <i>D8Ert482e</i>             | DNA segment, Chr 8, ERATO Doi 82, expressed                                      | 2.52 | 0.0 |
| <i>Entpd4 ///</i>            | ectonucleoside triphosphate diphosphohydrolase 4 ///                             | 2.52 | 0.0 |
| <i>LOC100862375</i>          | ectonucleoside triphosphate diphosphohydrolase 4-like                            |      |     |
| <i>Rnf152</i>                | ring finger protein 152                                                          | 2.52 | 0.0 |
| <i>Egfr</i>                  | epidermal growth factor receptor                                                 | 2.53 | 0.0 |
| <i>Btg1</i>                  | B cell translocation gene 1, anti-proliferative                                  | 2.53 | 0.0 |
| <i>Gm8369</i>                | predicted gene 8369                                                              | 2.53 | 0.0 |
| <i>Gm11425 /// LOC630855</i> | predicted gene 11425 /// 60S ribosomal protein L12-like                          | 2.54 | 0.0 |
| <i>/// Rpl12</i>             | /// ribosomal protein L12                                                        |      |     |
| <i>Mfsd2b</i>                | Major facilitator superfamily domain containing 2B                               | 2.54 | 0.0 |
| <i>Unc5b</i>                 | unc-5 homolog B ( <i>C. elegans</i> )                                            | 2.55 | 0.0 |
| <i>Bcar1</i>                 | breast cancer anti-estrogen resistance 1                                         | 2.55 | 0.0 |
| <i>Krt18</i>                 | keratin 18                                                                       | 2.56 | 0.0 |
| <i>Gfpt2</i>                 | glutamine fructose-6-phosphate transaminase 2                                    | 2.56 | 0.0 |
| <i>Kalrn</i>                 | kalirin, RhoGEF kinase                                                           | 2.56 | 5.2 |
| <i>9930012K11Rik</i>         | RIKEN cDNA 9930012K11 gene                                                       | 2.56 | 0.0 |

|                             |                                                                                                              |      |     |
|-----------------------------|--------------------------------------------------------------------------------------------------------------|------|-----|
| <i>2310014L17Rik</i>        | RIKEN cDNA 2310014L17 gene                                                                                   | 2.56 | 0.0 |
| <i>Twistnb</i>              | TWIST neighbor                                                                                               | 2.56 | 0.0 |
| <i>Gadd45a</i>              | growth arrest and DNA-damage-inducible 45 alpha                                                              | 2.56 | 0.0 |
| <i>Nedd9</i>                | neural precursor cell expressed, developmentally down-regulated gene 9                                       | 2.57 | 0.0 |
| <i>Snx10</i>                | Sorting nexin 10                                                                                             | 2.57 | 0.0 |
| <i>Itk</i>                  | IL2 inducible T cell kinase                                                                                  | 2.57 | 0.0 |
| <i>Lrp8</i>                 | low density lipoprotein receptor-related protein 8, apolipoprotein e receptor                                | 2.58 | 0.0 |
| <i>Eprs</i>                 | glutamyl-prolyl-tRNA synthetase                                                                              | 2.58 | 0.0 |
| <i>C230007H23Rik</i>        | RIKEN cDNA C230007H23 gene                                                                                   | 2.58 | 0.0 |
| <i>Gna13</i>                | guanine nucleotide binding protein, alpha 13                                                                 | 2.59 | 0.0 |
| <i>Crem</i>                 | cAMP responsive element modulator                                                                            | 2.59 | 0.0 |
| <i>4833411I10Rik</i>        | RIKEN cDNA 4833411I10 gene                                                                                   | 2.60 | 0.0 |
| <i>Gp49a /// Lilrb4</i>     | glycoprotein 49 A /// leukocyte immunoglobulin-like receptor, subfamily B, member 4                          | 2.61 | 0.0 |
| <i>Slc20a1</i>              | solute carrier family 20, member 1                                                                           | 2.61 | 0.0 |
| <i>E430014B02Rik</i>        | RIKEN cDNA E430014B02 gene                                                                                   | 2.61 | 0.0 |
| <i>Uchl1</i>                | ubiquitin carboxy-terminal hydrolase L1                                                                      | 2.63 | 0.0 |
| <i>Klhl29</i>               | kelch-like 29 (Drosophila)                                                                                   | 2.64 | 0.0 |
| <i>Prdm2</i>                | PR domain containing 2, with ZNF domain                                                                      | 2.64 | 0.0 |
| <i>Gm3776 /// Gsta1 ///</i> | predicted gene 3776 /// glutathione S-transferase, alpha 1 (Ya) /// glutathione S-transferase, alpha 2 (Yc2) | 2.64 | 0.0 |
| <i>Gsta2</i>                |                                                                                                              |      |     |
| <i>Gas2l3</i>               | growth arrest-specific 2 like 3                                                                              | 2.65 | 0.0 |
| <i>Tacstd2</i>              | tumor-associated calcium signal transducer 2                                                                 | 2.65 | 0.0 |
| <i>AA408650</i>             | expressed sequence AA408650                                                                                  | 2.65 | 0.0 |
| <i>Zbtb20</i>               | zinc finger and BTB domain containing 20                                                                     | 2.66 | 0.0 |
| <i>Nfkbid</i>               | nuclear factor of kappa light polypeptide gene enhancer in B cells inhibitor, delta                          | 2.66 | 0.0 |
| <i>Glipr1</i>               | GLI pathogenesis-related 1 (glioma)                                                                          | 2.66 | 0.0 |
| <i>Psme4</i>                | proteasome (prosome, macropain) activator subunit 4                                                          | 2.67 | 0.0 |
| <i>5730559C18Rik</i>        | RIKEN cDNA 5730559C18 gene                                                                                   | 2.67 | 0.0 |
| <i>Arg2</i>                 | arginase type II                                                                                             | 2.67 | 0.0 |
| <i>Ccdc86</i>               | coiled-coil domain containing 86                                                                             | 2.68 | 0.0 |
| <i>Adamts2</i>              | a disintegrin-like and metallopeptidase (reprolysin type) with thrombospondin type 1 motif, 2                | 2.69 | 0.0 |
| <i>2700038G22Rik</i>        | RIKEN cDNA 2700038G22 gene                                                                                   | 2.70 | 0.0 |
| <i>Preb</i>                 | prolactin regulatory element binding                                                                         | 2.70 | 0.0 |
| <i>Itpr1p</i>               | inositol 1,4,5-triphosphate receptor interacting protein                                                     | 2.71 | 0.0 |
| <i>Rin1</i>                 | Ras and Rab interactor 1                                                                                     | 2.71 | 0.0 |
| <i>Flnb</i>                 | filamin, beta                                                                                                | 2.71 | 0.0 |
| <i>Btla</i>                 | B and T lymphocyte associated                                                                                | 2.72 | 0.0 |
| <i>C230085N15Rik</i>        | RIKEN cDNA C230085N15 gene                                                                                   | 2.72 | 0.0 |
| <i>Krt8</i>                 | keratin 8                                                                                                    | 2.72 | 0.0 |
| <i>Fem1c</i>                | fem-1 homolog c (C.elegans)                                                                                  | 2.73 | 0.0 |
| <i>Gpr171</i>               | G protein-coupled receptor 171                                                                               | 2.74 | 0.0 |
| <i>Chd1</i>                 | chromodomain helicase DNA binding protein 1                                                                  | 2.74 | 0.0 |
| <i>Peg3</i>                 | paternally expressed 3                                                                                       | 2.74 | 0.0 |
| <i>Pvr</i>                  | poliovirus receptor                                                                                          | 2.75 | 0.0 |
| <i>4833422B07Rik</i>        | RIKEN cDNA 4833422B07 gene                                                                                   | 2.75 | 0.0 |

|                               |                                                                                 |      |     |
|-------------------------------|---------------------------------------------------------------------------------|------|-----|
| <i>Rnf144b</i>                | ring finger protein 144B                                                        | 2.76 | 5.2 |
| <i>Slc7a6</i>                 | solute carrier family 7 (cationic amino acid transporter, y+ system), member 6  | 2.77 | 0.0 |
| <i>4930523C07Rik</i>          | RIKEN cDNA 4930523C07 gene                                                      | 2.78 | 0.0 |
| <i>Nudt6</i>                  | nudix (nucleoside diphosphate linked moiety X)-type motif 6                     | 2.78 | 0.0 |
| <i>Plcxd2</i>                 | phosphatidylinositol-specific phospholipase C, X domain containing 2            | 2.78 | 0.0 |
| <i>Srxn1</i>                  | sulfiredoxin 1 homolog ( <i>S. cerevisiae</i> )                                 | 2.79 | 5.2 |
| <i>Trib1</i>                  | tribbles homolog 1 ( <i>Drosophila</i> )                                        | 2.79 | 0.0 |
| <i>Myo1e</i>                  | myosin IE                                                                       | 2.79 | 0.0 |
| <i>Tox</i>                    | thymocyte selection-associated high mobility group box                          | 2.79 | 0.0 |
| <i>Litaf</i>                  | LPS-induced TN factor                                                           | 2.81 | 0.0 |
| <i>Sphk1</i>                  | sphingosine kinase 1                                                            | 2.81 | 0.0 |
| <i>Plk3</i>                   | polo-like kinase 3                                                              | 2.81 | 0.0 |
| <i>Cd28</i>                   | CD28 antigen                                                                    | 2.82 | 0.0 |
| <i>Anxa1</i>                  | annexin A1                                                                      | 2.83 | 5.2 |
| <i>Gprc5b</i>                 | G protein-coupled receptor, family C, group 5, member B                         | 2.83 | 0.0 |
| <i>Lox</i>                    | lysyl oxidase                                                                   | 2.84 | 0.0 |
| <i>Zfand5</i>                 | zinc finger, AN1-type domain 5                                                  | 2.85 | 0.0 |
| <i>Pkib</i>                   | protein kinase inhibitor beta, cAMP dependent, testis specific                  | 2.87 | 0.0 |
| <i>Dnajc25</i>                | DnaJ (Hsp40) homolog, subfamily C, member 25                                    | 2.92 | 0.0 |
| <i>Armcx5</i>                 | armadillo repeat containing, X-linked 5                                         | 2.92 | 0.0 |
| <i>Slc22a3</i>                | solute carrier family 22 (organic cation transporter), member 3                 | 2.93 | 0.0 |
| <i>Rab20</i>                  | RAB20, member RAS oncogene family                                               | 2.93 | 0.0 |
| <i>Gab2</i>                   | growth factor receptor bound protein 2-associated protein 2                     | 2.95 | 0.0 |
| <i>Sh3pxd2b</i>               | SH3 and PX domains 2B                                                           | 2.95 | 0.0 |
| <i>LOC100862072 /// Loxl2</i> | lysyl oxidase homolog 2-like /// lysyl oxidase-like 2                           | 2.97 | 0.0 |
| <i>Fam46b</i>                 | family with sequence similarity 46, member B                                    | 2.97 | 0.0 |
| <i>Slc7a11</i>                | solute carrier family 7 (cationic amino acid transporter, y+ system), member 11 | 2.97 | 5.2 |
| <i>Slc12a9</i>                | solute carrier family 12 (potassium/chloride transporters), member 9            | 2.98 | 0.0 |
| <i>Ptpn22</i>                 | protein tyrosine phosphatase, non-receptor type 22 (lymphoid)                   | 3.00 | 0.0 |
| <i>Fcgr4</i>                  | Fc receptor, IgG, low affinity IV                                               | 3.01 | 0.0 |
| <i>Colla1</i>                 | collagen, type I, alpha 1                                                       | 3.01 | 0.0 |
| <i>Elp4</i>                   | elongation protein 4 homolog ( <i>S. cerevisiae</i> )                           | 3.01 | 0.0 |
| <i>Pdk4</i>                   | pyruvate dehydrogenase kinase, isoenzyme 4                                      | 3.01 | 0.0 |
| <i>Eln</i>                    | elastin                                                                         | 3.02 | 0.0 |
| <i>Tlr13</i>                  | toll-like receptor 13                                                           | 3.02 | 0.0 |
| <i>Slco1c1</i>                | solute carrier organic anion transporter family, member 1c1                     | 3.02 | 0.0 |
| <i>Id2</i>                    | inhibitor of DNA binding 2                                                      | 3.02 | 0.0 |
| <i>Cd300lf</i>                | CD300 antigen like family member F                                              | 3.04 | 0.0 |
| <i>2810403A07Rik</i>          | RIKEN cDNA 2810403A07 gene                                                      | 3.05 | 0.0 |
| <i>G530011O06Rik</i>          | RIKEN cDNA G530011O06 gene                                                      | 3.06 | 0.0 |

|                       |                                                                                                |      |     |
|-----------------------|------------------------------------------------------------------------------------------------|------|-----|
| <i>Zfp106</i>         | zinc finger protein 106                                                                        | 3.07 | 0.0 |
| <i>Leo1</i>           | Leo1, Paf1/RNA polymerase II complex component, homolog ( <i>S. cerevisiae</i> )               | 3.07 | 0.0 |
| <i>Slc39a14</i>       | solute carrier family 39 (zinc transporter), member 14                                         | 3.08 | 0.0 |
| <i>Inhbb</i>          | inhibin beta-B                                                                                 | 3.09 | 0.0 |
| <i>D14Erd449e ///</i> | DNA segment, Chr 14, ERATO Doi 449, expressed ///                                              | 3.10 | 0.0 |
| <i>Gm10395 ///</i>    | predicted gene 10395 ///                                                                       |      |     |
| <i>Gm9746</i>         | predicted gene 9746                                                                            |      |     |
| <i>Chd7</i>           | chromodomain helicase DNA binding protein 7                                                    | 3.10 | 0.0 |
| <i>Thbs1</i>          | thrombospondin 1                                                                               | 3.11 | 0.0 |
| <i>Dusp3</i>          | dual specificity phosphatase 3 ( <i>vaccinia virus</i> phosphatase VH1-related)                | 3.13 | 0.0 |
| <i>Ikzf4</i>          | IKAROS family zinc finger 4                                                                    | 3.14 | 0.0 |
| <i>Tnc</i>            | tenascin C                                                                                     | 3.14 | 0.0 |
| <i>9130221J17Rik</i>  | RIKEN cDNA 9130221J17 gene                                                                     | 3.16 | 0.0 |
| <i>Rcan1</i>          | regulator of calcineurin 1                                                                     | 3.16 | 0.0 |
| <i>5830453J16Rik</i>  | RIKEN cDNA 5830453J16 gene                                                                     | 3.16 | 0.0 |
| <i>Pdlim7</i>         | PDZ and LIM domain 7                                                                           | 3.17 | 0.0 |
| <i>Stc1</i>           | stanniocalcin 1                                                                                | 3.19 | 0.0 |
| <i>Rprd2</i>          | regulation of nuclear pre-mRNA domain containing 2                                             | 3.20 | 0.0 |
| <i>Cdr2</i>           | cerebellar degeneration-related 2                                                              | 3.21 | 0.0 |
| <i>9630009C16</i>     | uncharacterized protein 9630009C16                                                             | 3.21 | 0.0 |
| <i>Plk2</i>           | polo-like kinase 2                                                                             | 3.22 | 0.0 |
| <i>Mrpl15</i>         | mitochondrial ribosomal protein L15                                                            | 3.24 | 0.0 |
| <i>Rhou</i>           | ras homolog gene family, member U                                                              | 3.25 | 0.0 |
| <i>Hk2</i>            | hexokinase 2                                                                                   | 3.27 | 0.0 |
| <i>Plaur</i>          | plasminogen activator, urokinase receptor                                                      | 3.32 | 0.0 |
| <i>Il1rn</i>          | interleukin 1 receptor antagonist                                                              | 3.32 | 0.0 |
| <i>Mbnl3</i>          | muscleblind-like 3 ( <i>Drosophila</i> )                                                       | 3.35 | 0.0 |
| <i>2010109K09Rik</i>  | RIKEN cDNA 2010109K09 gene                                                                     | 3.37 | 0.0 |
| <i>5033430I15Rik</i>  | RIKEN cDNA 5033430I15 gene                                                                     | 3.37 | 0.0 |
| <i>Cald1</i>          | caldesmon 1                                                                                    | 3.38 | 0.0 |
| <i>Akap12</i>         | A kinase (PRKA) anchor protein (gravin) 12                                                     | 3.39 | 0.0 |
| <i>Abtb2</i>          | ankyrin repeat and BTB (POZ) domain containing 2                                               | 3.42 | 0.0 |
| <i>Cflar</i>          | CASP8 and FADD-like apoptosis regulator                                                        | 3.44 | 0.0 |
| <i>Gjb2</i>           | gap junction protein, beta 2                                                                   | 3.45 | 0.0 |
| <i>Sdcbp2</i>         | syndecan binding protein (syntenin) 2                                                          | 3.47 | 0.0 |
| <i>Eppk1</i>          | epiplakin 1                                                                                    | 3.48 | 0.0 |
| <i>Rbm12</i>          | RNA binding motif protein 12                                                                   | 3.48 | 0.0 |
| <i>Pi15</i>           | peptidase inhibitor 15                                                                         | 3.48 | 0.0 |
| <i>Cxcl1</i>          | chemokine (C-X-C motif) ligand 1                                                               | 3.48 | 0.0 |
| <i>Spon2</i>          | spondin 2, extracellular matrix protein                                                        | 3.51 | 0.0 |
| <i>1700109H08Rik</i>  | RIKEN cDNA 1700109H08 gene                                                                     | 3.51 | 0.0 |
| <i>Rasd1</i>          | RAS, dexamethasone-induced 1                                                                   | 3.53 | 0.0 |
| <i>Adamts15</i>       | a disintegrin-like and metallopeptidase (reprolysin type) with thrombospondin type 1 motif, 15 | 3.54 | 0.0 |
| <i>Slfn1</i>          | schlafen 1                                                                                     | 3.55 | 5.2 |
| <i>Slc16a6</i>        | solute carrier family 16 (monocarboxylic acid transporters), member 6                          | 3.58 | 0.0 |
| <i>Selp</i>           | selectin, platelet                                                                             | 3.58 | 0.0 |
| <i>Ptpn2</i>          | protein tyrosine phosphatase, non-receptor type 2                                              | 3.61 | 0.0 |

|                              |                                                                                               |      |     |
|------------------------------|-----------------------------------------------------------------------------------------------|------|-----|
| <i>Spry4</i>                 | sprouty homolog 4 (Drosophila)                                                                | 3.63 | 0.0 |
| <i>Cdkn1a</i>                | cyclin-dependent kinase inhibitor 1A (P21)                                                    | 3.64 | 0.0 |
| <i>6330406I15Rik</i>         | RIKEN cDNA 6330406I15 gene                                                                    | 3.65 | 0.0 |
| <i>Maff</i>                  | v-maf musculoaponeurotic fibrosarcoma oncogene family, protein F (avian)                      | 3.65 | 0.0 |
| <i>Syk</i>                   | spleen tyrosine kinase                                                                        | 3.66 | 0.0 |
| <i>H2-Q10</i>                | histocompatibility 2, Q region locus 10                                                       | 3.66 | 0.0 |
| <i>Gadd45g</i>               | growth arrest and DNA-damage-inducible 45 gamma                                               | 3.66 | 0.0 |
| <i>Slc16a13</i>              | solute carrier family 16 (monocarboxylic acid transporters), member 13                        | 3.68 | 0.0 |
| <i>9430076C15Rik</i>         | RIKEN cDNA 9430076C15 gene                                                                    | 3.68 | 0.0 |
| <i>Pmvk</i>                  | phosphomevalonate kinase                                                                      | 3.69 | 0.0 |
| <i>Slc38a4</i>               | solute carrier family 38, member 4                                                            | 3.74 | 0.0 |
| <i>Il18rap</i>               | interleukin 18 receptor accessory protein                                                     | 3.74 | 0.0 |
| <i>Ccr1</i>                  | chemokine (C-C motif) receptor 1                                                              | 3.77 | 0.0 |
| <i>Sbno2</i>                 | strawberry notch homolog 2 (Drosophila)                                                       | 3.82 | 0.0 |
| <i>Socs3</i>                 | suppressor of cytokine signaling 3                                                            | 3.84 | 0.0 |
| <i>Btbd11</i>                | BTB (POZ) domain containing 11                                                                | 3.88 | 0.0 |
| <i>Bcl3</i>                  | B cell leukemia/lymphoma 3                                                                    | 3.89 | 0.0 |
| <i>Gm19966</i>               | predicted gene, 19966                                                                         | 3.94 | 0.0 |
| <i>Nlrc3</i>                 | NLR family, CARD domain containing 3                                                          | 3.95 | 0.0 |
| <i>Sgms2</i>                 | sphingomyelin synthase 2                                                                      | 4.01 | 0.0 |
| <i>Tnfrsf12a</i>             | tumor necrosis factor receptor superfamily, member 12a                                        | 4.01 | 0.0 |
| <i>O3far1</i>                | omega-3 fatty acid receptor 1                                                                 | 4.01 | 0.0 |
| <i>Prkcg</i>                 | protein kinase C, gamma                                                                       | 4.03 | 0.0 |
| <i>Tnfaip6</i>               | tumor necrosis factor alpha induced protein 6                                                 | 4.04 | 0.0 |
| <i>Adamts4</i>               | a disintegrin-like and metallopeptidase (reprolysin type) with thrombospondin type 1 motif, 4 | 4.06 | 0.0 |
| <i>Tubb6</i>                 | tubulin, beta 6 class V                                                                       | 4.06 | 0.0 |
| <i>Dus4l</i>                 | dihydrouridine synthase 4-like (S. cerevisiae)                                                | 4.09 | 0.0 |
| <i>Gm3893 /// Gm5859 ///</i> | predicted gene 3893 /// predicted pseudogene 5859 ///                                         | 4.10 | 0.0 |
| <i>Gm7819 ///</i>            | predicted gene 7819 /// protein FAM205A-like ///                                              |      |     |
| <i>LOC100861635 ///</i>      | uncharacterized LOC100862237                                                                  |      |     |
| <i>LOC100862237</i>          |                                                                                               |      |     |
| <i>Mt1</i>                   | metallothionein 1                                                                             | 4.10 | 0.0 |
| <i>Cldn23</i>                | claudin 23                                                                                    | 4.11 | 0.0 |
| <i>Obfc2a</i>                | oligonucleotide/oligosaccharide-binding fold containing 2A                                    | 4.14 | 0.0 |
| <i>9230110K08Rik</i>         | RIKEN cDNA 9230110K08 gene                                                                    | 4.18 | 0.0 |
| <i>Ereg</i>                  | epiregulin                                                                                    | 4.19 | 0.0 |
| <i>Acta1</i>                 | actin, alpha 1, skeletal muscle                                                               | 4.21 | 0.0 |
| <i>Gem</i>                   | GTP binding protein (gene overexpressed in skeletal muscle)                                   | 4.27 | 0.0 |
| <i>Trem1</i>                 | triggering receptor expressed on myeloid cells 1                                              | 4.29 | 0.0 |
| <i>Bcl6b</i>                 | B cell CLL/lymphoma 6, member B                                                               | 4.37 | 0.0 |
| <i>Serpine1</i>              | serine (or cysteine) peptidase inhibitor, clade E, member 1                                   | 4.38 | 0.0 |
| <i>Slc26a4</i>               | solute carrier family 26, member 4                                                            | 4.39 | 0.0 |
| <i>Sprr1a</i>                | small proline-rich protein 1A                                                                 | 4.51 | 0.0 |
| <i>Cd69</i>                  | CD69 antigen                                                                                  | 4.56 | 0.0 |
| <i>Tmem242</i>               | transmembrane protein 242                                                                     | 4.60 | 0.0 |

|                          |                                                                                               |      |     |
|--------------------------|-----------------------------------------------------------------------------------------------|------|-----|
| <i>Pde10a</i>            | phosphodiesterase 10A                                                                         | 4.61 | 0.0 |
| <i>Itpr2</i>             | Inositol 1,4,5-triphosphate receptor 2                                                        | 4.62 | 0.0 |
| <i>Txndc9</i>            | thioredoxin domain containing 9                                                               | 4.63 | 0.0 |
| <i>Myc</i>               | myelocytomatosis oncogene                                                                     | 4.64 | 0.0 |
| <i>Adm</i>               | adrenomedullin                                                                                | 4.66 | 0.0 |
| <i>Kcne4</i>             | potassium voltage-gated channel, Isk-related subfamily, gene 4                                | 4.69 | 0.0 |
| <i>Adora2b</i>           | adenosine A2b receptor                                                                        | 4.71 | 0.0 |
| <i>Ccrn4l</i>            | CCR4 carbon catabolite repression 4-like ( <i>S. cerevisiae</i> )                             | 4.75 | 0.0 |
| <i>Marco</i>             | macrophage receptor with collagenous structure                                                | 4.81 | 0.0 |
| <i>Ppp2ca</i>            | protein phosphatase 2 (formerly 2A), catalytic subunit, alpha isoform                         | 4.88 | 0.0 |
| <i>4933409K07Rik</i> /// | RIKEN cDNA 4933409K07 gene ///                                                                | 4.89 | 0.0 |
| <i>Gm10590</i> ///       | predicted gene 10590                                                                          |      |     |
| <i>Gm2163</i> ///        | predicted gene 2163                                                                           |      |     |
| <i>Gm3893</i> ///        | predicted gene 3893                                                                           |      |     |
| <i>Gm5859</i> ///        | predicted pseudogene 5859                                                                     |      |     |
| <i>Gm7819</i> ///        | predicted gene 7819                                                                           |      |     |
| <i>LOC100041516</i> ///  | protein FAM205A-like                                                                          |      |     |
| <i>LOC100861610</i> ///  | uncharacterized                                                                               |      |     |
| <i>LOC100861635</i>      | LOC100861610 protein FAM205A-like                                                             |      |     |
| <i>Ly6g6c</i>            | lymphocyte antigen 6 complex, locus G6C                                                       | 4.89 | 0.0 |
| <i>Cd33</i>              | CD33 antigen                                                                                  | 5.01 | 0.0 |
| <i>Tlk2</i>              | tousled-like kinase 2 ( <i>Arabidopsis</i> )                                                  | 5.08 | 0.0 |
| <i>Adamts9</i>           | a disintegrin-like and metallopeptidase (reprolysin type) with thrombospondin type 1 motif, 9 | 5.13 | 0.0 |
| <i>Sdcbp</i>             | syndecan binding protein                                                                      | 5.25 | 0.0 |
| <i>Gdnf</i>              | glial cell line derived neurotrophic factor                                                   | 5.27 | 0.0 |
| <i>D14Erd449e</i>        | DNA segment, Chr 14, ERATO Doi 449, expressed                                                 | 5.29 | 5.2 |
| <i>Mfsd2a</i>            | major facilitator superfamily domain containing 2A                                            | 5.32 | 0.0 |
| <i>Clec4d</i>            | C-type lectin domain family 4, member d                                                       | 5.40 | 0.0 |
| <i>Cxcl5</i>             | chemokine (C-X-C motif) ligand 5                                                              | 5.44 | 0.0 |
| <i>Gm13889</i>           | predicted gene 13889                                                                          | 5.52 | 0.0 |
| <i>AU023617</i>          | expressed sequence AU023617                                                                   | 5.54 | 0.0 |
| <i>Fbxw10</i> ///        | F-box and WD-40 domain protein 10                                                             | 5.71 | 0.0 |
| <i>Trim16</i>            | tripartite motif-containing 16                                                                |      |     |
| <i>Calca</i>             | calcitonin/calcitonin-related polypeptide, alpha                                              | 5.78 | 0.0 |
| <i>Mt2</i>               | metallothionein 2                                                                             | 5.81 | 0.0 |
| <i>Areg</i>              | amphiregulin                                                                                  | 5.86 | 0.0 |
| <i>Iffo2</i>             | intermediate filament family orphan 2                                                         | 5.97 | 0.0 |
| <i>Rdh12</i>             | retinol dehydrogenase 12                                                                      | 5.99 | 0.0 |
| <i>Nfe2l2</i>            | nuclear factor, erythroid derived 2, like 2                                                   | 6.08 | 0.0 |
| <i>AA467197</i>          | expressed sequence AA467197                                                                   | 6.12 | 0.0 |
| <i>Trim15</i>            | tripartite motif-containing 15                                                                | 6.31 | 0.0 |
| <i>Sfn</i>               | stratifin                                                                                     | 7.04 | 0.0 |
| <i>Creb5</i>             | cAMP responsive element binding protein 5                                                     | 7.12 | 0.0 |
| <i>Arhgef7</i>           | Rho guanine nucleotide exchange factor (GEF7)                                                 | 7.13 | 0.0 |
| <i>Alpl</i>              | alkaline phosphatase, liver/bone/kidney                                                       | 7.28 | 0.0 |
| <i>Arid5a</i>            | AT rich interactive domain 5A (MRF1-like)                                                     | 8.25 | 0.0 |
| <i>Rad18</i>             | RAD18 homolog ( <i>S. cerevisiae</i> )                                                        | 8.28 | 0.0 |
| <i>Ptx3</i>              | pentraxin related gene                                                                        | 8.75 | 0.0 |
| <i>Clec4e</i>            | C-type lectin domain family 4, member e                                                       | 8.95 | 0.0 |

|                  |                                                     |        |     |
|------------------|-----------------------------------------------------|--------|-----|
| <i>Arntl</i>     | aryl hydrocarbon receptor nuclear translocator-like | 9.95   | 0.0 |
| <i>Mmp8</i>      | matrix metalloproteinase 8                          | 10.43  | 0.0 |
| <i>Apol8</i>     | apolipoprotein L 8                                  | 12.51  | 0.0 |
| <i>Fos1</i>      | fos-like antigen 1                                  | 12.92  | 0.0 |
| <i>Prss22</i>    | protease, serine, 22                                | 14.51  | 0.0 |
| <i>Angptl4</i>   | angiopoietin-like 4                                 | 15.94  | 0.0 |
| <i>Nfil3</i>     | nuclear factor, interleukin 3, regulated            | 18.51  | 0.0 |
| <i>Cxcl2</i>     | chemokine (C-X-C motif) ligand 2                    | 19.14  | 0.0 |
| <i>Dio2</i>      | deiodinase, iodothyronine, type II                  | 21.83  | 0.0 |
| <i>Has1</i>      | hyaluronan synthase 1                               | 22.59  | 0.0 |
| <i>Cldn4</i>     | claudin 4                                           | 27.05  | 0.0 |
| <i>Krtap17-1</i> | keratin associated protein 17-1                     | 29.21  | 0.0 |
| <i>Il1r2</i>     | interleukin 1 receptor, type II                     | 29.39  | 0.0 |
| <i>Apol1</i>     | apolipoprotein L domain containing 1                | 39.16  | 0.0 |
| <i>Il6</i>       | interleukin 6                                       | 146.46 | 0.0 |

<sup>a</sup> FC: fold change, which is calculated by dividing the expression in VILI-exposed WT mice by the expression in WT control mice.
