# Supplementary material for: Genes Influenced by the Non-Muscle Isoform of Myosin Light Chain Kinase Impact Human Cancer Prognosis
Source: PubMed Central journal article supplement (PMC3979809; doi:10.1371/journal.pone.0094325), 2014-04-08
Supplement: pone.0094325.s008.pdf [file pone.0094325.s008.pdf]

Table S3. Univariate Cox proportional hazards regression of overall survival against M38+*MYLK* signature status

| Cancer | Training     |                         |                 | Testing      |                         |                 |
|--------|--------------|-------------------------|-----------------|--------------|-------------------------|-----------------|
|        | Hazard ratio | 95% Confidence interval | <i>P</i> -value | Hazard ratio | 95% Confidence interval | <i>P</i> -value |
| Breast | 3.77         | (1.91, 7.45)            | < 0.001         | 2.65         | (1.29, 5.45)            | 0.008           |
| Colon  | 2.72         | (1.66, 4.46)            | < 0.001         | 2.93         | (1.12, 7.65)            | 0.028           |
| Glioma | 2.62         | (1.55, 4.43)            | < 0.001         | 1.86         | (0.92, 3.77)            | 0.085           |
| Lung   | 2.68         | (1.78, 4.04)            | < 0.001         | 1.40         | (0.93, 2.09)            | 0.106           |
